# Supplementary material for: The E2A splice variant E47 regulates the differentiation of projection neurons via p57(KIP2) during cortical development
Source: Oxford University Press journal article supplement (doi:10.1242/dev.145698), 2017-01-01
Supplement: dev145698supp.pdf [file dev145698supp.pdf]

## Supplementary Materials and Methods

### *In situ* hybridization (ISH)

Nonradioactive ISH was performed on cryosections of wild-type (WT) mice as described previously (Ernsberger et al., 1997) using a *Tcf3* specific probe. For ISH, Digoxigenin (DIG) labeled probes were diluted 1:1000 in hybridization buffer. Hybridization and subsequent washing was performed at 68°C, washing with maleic acid buffer and 0.1% Tween (MABT) was carried out 2 × 30 min before sections were blocked with lamb serum at RT for 1 h. Anti-DIG alkaline phosphatase conjugate was diluted 1:5000. The color reaction was performed overnight at RT using NBT/BCIP Stock Solution (Roche) diluted 1:100. *In situ* probes were *in vitro* transcribed from linearized plasmids at 37°C for 2 h. The following primers were used:

*Tcf3* Fwd: 5`-GTCCTGGGTGGATGATGAACC-3`

*Tcf3* Rev: 5`-CAACGAAGAAGCTGTGACG-3`

### Immunohistochemistry (IHC)

Primary antibodies used for IHC: rabbit anti-E2A (1:1000, sc-349X, Santa Cruz Biotechnology), goat anti-GFP (1:1000, Abcam), rabbit anti-Ki67 (1:500, Abcam), goat anti-Nestin (1:200, Santa Cruz Biotechnology), rabbit anti-NeuN (1:2000, Abcam), rabbit anti-p57(KIP2) (1:500, Sigma P0357), mouse anti-Pax6 (1:50, Developmental Studies Hybridoma Bank), mouse anti-Satb2 (1:500, Abcam), rabbit anti-Tbr1 (1:500, Abcam), rabbit anti-Tbr2 (1:2000, Millipore), rat anti-Tbr2 (1:500, Invitrogen), guinea pig anti-Vglut1 (1:500, Millipore), mouse anti-Mash1 (1:500, BD Bioscience), rat anti-Ctip2 (1:500, Abcam), mouse anti-Sox2 (1:1000, Abcam), rabbit anti-Ngn2 (1:200, Cell

Signaling), mouse anti-neurofilament (1:100, Developmental Study Hybridoma Bank), mouse anti-Tuj-1 (1:200, Millipore), rabbit anti-cleaved caspase-3 (1:100, Cell Signaling), mouse anti-Gad67 (1:1000, Millipore), rabbit anti-Math2 (1:1000, Abcam), mouse anti-NeuroD1 (1:1000, Abcam). Secondary antibodies used were conjugated with fluorescein isothiocyanate (FITC), Alexa Fluor 488 or 594 (1:200, Jackson ImmunoResearch Laboratories). Sections were coverslipped with 4',6-diamidino-2-phenylindole (DAPI) Fluoromount-G® solution (Southern Biotech).

### **Immunocytochemistry (ICC)**

Primary antibodies used for ICC: rat anti-BrdU (1:300, Abcam), rabbit anti-cleaved caspase-3 (1:100, Cell Signaling), goat anti-GFP (1:1000, Abcam) or mouse anti-Tuj-1 (1:100, Millipore) in 1% BSA/PBS overnight. After three washes in PBS, cells were incubated with an appropriate secondary antibody conjugated with either FITC, Alexa Fluor 488 or 594 (1:200, Jackson ImmunoResearch Laboratories) for 1 h in 1% BSA/PBS at RT, washed in PBS, and mounted with DAPI Fluoromount-G® solution (Southern Biotechnology).

### **Neurite outgrowth assay**

For the neurite outgrowth assays, 125,000 electroporated WT and *E47*<sup>-/-</sup> cells were cultured in differentiation medium, allowed to extend processes for 48 h (Fig. 7A,B) or for 24 h (Fig 7H,I) and stained for Tuj-1. Neurite outgrowth was determined as the proportion of cells bearing neurites two times longer than the diameter of the cell body, an indication of successful initiation of neurite outgrowth (Schachtrup et al., 2007). The number of neurite-bearing cells was measured from at least 200 GFP<sup>+</sup> neurons per

condition. Quantification of cell numbers was performed using ImageJ software (National Institutes of Health).

### **RNA isolation and quantitative PCR**

The following primers were used for quantitative PCR:

*E12* Fwd: 5'-GGGAGGAGAAAGAGGATGA-3'

*E12* Rev: 5'-GCTCCGCCTTCTGCTCTG-3'

*E47* Fwd: 5'-GGGAGGAGAAAGAGGATGA-3'

*E47* Rev: 5'-CCGGTCCCTCAGGTCCTTC-3'

*E-cadherin* Fwd: 5'-AATGGCGGCAATGCAATCCCAAGA-3'

*E-cadherin* Rev: 5'-TGCCACAGACCGATTGTGGAGATA-3'

*Gapdh* Fwd: 5'-CAAGGCCGAGAATGGGAAG-3'

*Gapdh* Rev: 5'-GGCCTCACCCCATTTGATGT-3'

*Cdkn1a* Fwd: 5'- CCT GGTGATGTCCGACCTG-3'

*Cdkn1a* Rev: 5'- CCATGAGCGCATCGCAATC-3'

*Cdkn1b* Fwd: 5'- TCAAACGTGAGAGTGTCTAACG-3'

*Cdkn1b* Rev: 5'- CCGGGCCGAAGAGATTTCTG-3'

*Cdkn1c* Fwd: 5'-CGAGGAGCAGGACGAGAATC-3'

*Cdkn1c* Rev: 5'-GAAGAAGTCGTTTCGCATTGGC-3'

### **Chromatin Immunoprecipitation Sequencing (ChIP-Seq)**

Embryonic NSCs (approx.  $10 \times 10^6$  cells) were fixed with 1.5 mM ethylene glycol bis[succinimidyl succinate] in DMSO for 20 min at RT, followed by adding

formaldehyde to a final concentration of 1%, incubated for 10 min at RT and finally quenched by 0.2 M glycine. Cells were then lysed and sonicated with a microtip for 10 seconds followed by a 1 min break for 10 cycles. After adding 1% Triton-X to the sonicated lysates, ChIP was performed overnight at 4°C with Dynabeads M-280 Sheep anti-Rabbit IgG (Thermo Fisher, 11203D) linked to either rabbit anti-E2A (1.5 µg, sc-349X, Santa Cruz Biotechnology) or control rabbit anti-IgG (1.5 µg, sc-2027, Santa Cruz Biotechnology). 10% of sonicated suspension was kept as input control. After washing and elution of chromatin-antibody complexes from the beads at 65°C overnight, crosslinking was reversed by proteinase K and RNase digestion. Genomic DNA and DNA from the sonicated input were purified using a PCR Purification Kit (Qiagen).

### **Luciferase reporter transactivation assays**

The reporter constructs were co-transfected with the constitutively active *Renilla reniformis* luciferase producing vector pRL-CMV (Promega) into HEK293T cells by calcium phosphate co-precipitation. Cells were lysed 24 h after transfection using passive lysis buffer (Promega). Luciferase activity was determined in duplicates using a 96-well plate reader (PerkinElmer) with automatic injection of 100 µl substrate and measurement for 10 seconds after a 2 second delay. For measuring *Renilla* luciferase activity, the *Renilla Juice Kit* (PJK) was used as a substrate according to the manufacturer's instructions. Firefly luciferase activity was quantified by using firefly substrate solution containing luciferin. For cloning of the reporter construct the following primers were used:

*p57-Intron (p57-I)* Fwd: 5'-AGATCTCAAGGGCCCAAGAGAGTGC-3'



*p57-Intron (p57-I)* Rev: 5'- AGATCTGCCAAACTTCTCTGGCCAAT-3'

*p57-Downstream (p57-II)* Fwd: 5'- AGATCTGTTCT-CCCGCAAGGACCATT-3'

*p57-Downstream (p57-II)* Rev: 5'- AGATCTGCAGAGGCAGTCCCATGAAA-3'

*p57-Distal Intergenic (p57-III)* Fwd: 5'-AGATCTAGGTAGGGATGGTCCCAGAC-3'

*p57-Distal Intergenic (p57-III)* Rev: 5'-AGATCTGGTCATACACCACAAGGGCA-3'

### **Immunoblots**

The following antibodies were used for Western blotting: mouse anti-E12 (1:5000, BD Pharmingen, Cat.no. 6656/A), mouse anti-E47 (1:6000, BD Pharmingen, Cat.no. 554077), mouse anti-E47 (1:6666, BD Pharmingen, Cat.no. 554199), rabbit anti-GAPDH (1:1000, Cell Signaling), rabbit anti-GFP (1:1000, Cell Signaling).

### **Co-immunoprecipitation**

Co-immunoprecipitation was performed as described (Schachtrup et al., 2015). For endogenous co-immunoprecipitation, cell lysates of primary embryonic NSC cultures were incubated with rabbit anti-mouse E2A antibody (5 µg, sc-349X, Santa Cruz Biotechnology) bound to A-agarose beads for 4 h at 4°C. Cell lysates were probed with the following antibodies: rabbit anti-Limk (1:1000, Cell Signaling), mouse anti-NeuroD1 (1:1000, Abcam), rabbit anti-NeuroD2 (1:1000, Abcam), rabbit anti-Math2 (1:500, Abcam), rabbit anti-Ngn2 (1:500, Santa Cruz), and rabbit anti-Mash1(1:500, Abcam).

### ***In utero* electroporation**

For *in utero* electroporation, DNA constructs were dissolved in sterile PBS (3-4 µg/µl), mixed with a fast green contrast dye and injected into the lateral ventricles of each

embryo at E13.5 of pregnant C57BL/6J mice using a microinjector and pulled Borosilicate glass capillaries. Electroporation was performed by applying ten pulses of 40 V and a pulse length of 50 ms within a 950 ms interval to the head of each embryo with the anode of the electrode oriented toward the injected side. After injection and electroporation, the uterus was replaced in the body cavity, the muscle and the skin sutured and the embryos were allowed to develop until E15.5 before isolation. The following plasmids were used: pCAGGs-IRES-eGFP and hE47<sup>WT</sup>-IRES-eGFP.

### **Microscopy and imaging analysis**

Representative images of *E2A* mRNA expression on sagittal brain sections were acquired with an Axioplan 2 Imaging epifluorescence microscope and dry Plan-NEOFLUAR objectives (10x/0,30 NA; 20x/0,50 NA), an Axiocam HRc CCD camera and the AxioVision image analysis software (Carl Zeiss). For quantification analyses of cell populations or immunoreactivity on sagittal brain sections as well as for *in vitro* overexpression assays, BrdU labeling studies, and apoptosis assays, microscopic images were acquired with an AxioImager.M2 epifluorescence microscope and dry Plan-NEOFLUAR objectives (10x/0,30 NA; 20x/0,50 NA; 40x/0,75 NA), an Axiocam HRc CCD camera and the image analysis software ZEN 2012 blue edition (Carl Zeiss). Representative images and images for quantification analyses were acquired with a TCS SP8 confocal laser scanning microscope using the 40x oil immersion objective and the LAS AF image analysis software (Leica). For quantification analyses of neurosphere diameter, microscopic images were acquired with a Leica DM LED Fluo inverted microscope and dry N PLAN objective (5x/0,12 NA) and HI PLAN objective (10x/0,25), a Leica DFC3000 G camera and the image analysis software LAS AF. For quantification

of the number of Tbr1, Satb2, Ctip2, Pax6, Sox2, NeuN, Ngn2, and cleaved caspase-3 cells, we analyzed an area in the caudal neocortex spanning the cortical wall from the ventricular surface to the pia with a width of 40  $\mu\text{m}$  (Satb2, E14.5), 80 $\mu\text{m}$  (Sox2, E14.5), 100  $\mu\text{m}$  (NeuN, Ngn2, and Tbr2 at E14.5), 120  $\mu\text{m}$  (Satb2 at E18.5), 150  $\mu\text{m}$  (Satb2 at P3), 200  $\mu\text{m}$  (Tbr1, Pax6, and Ctip2 at E14.5), 374 $\mu\text{m}$  (Tbr1 at E18.5), 400  $\mu\text{m}$  (Tbr1 at P3), and 700  $\mu\text{m}$  (cleaved caspase-3). For Tbr1 bin quantification, defined areas as indicated above were subdivided into 10 equal bins along the dorsoventral axis and the number of cells in each bin was determined (Magno et al., 2012). For quantification analysis of p57(KIP2), and neurofilament, we analyzed an area in the caudal neocortex spanning the cortical wall from the ventricular surface to the pia with a width of 145 $\mu\text{m}$  (neurofilament at E14.5), 200 $\mu\text{m}$  (p57(KIP2) at E12.5), and 500  $\mu\text{m}$  (p57(KIP2) at E14.5). For immunoreactivity analysis of E2A in Pax6+ cells (Fig. 1D), we divided Pax6 labeled VZ into apical region (40 $\mu\text{m}$  from the ventricular surface) and basal region (100 $\mu\text{m}$  from the apical region) (Kowalczyk et al., 2009). E2A+ cells colocalizing with Pax6 were analyzed in the apical and basal VZ with a width of 250 $\mu\text{m}$ . For immunoreactivity analysis of E2A in Ki67+ cells (Fig. 1E), E2A+/Ki67+ cells (10 cells per animal) were randomly selected in the total VZ and the number of pixels with an intensity above a predetermined threshold level was determined as E2A<sup>high</sup> and E2A<sup>low</sup> (Fig. 1D and Fig. 1E). For quantification of the number of GFP+/p57(KIP2)+ cells after *in utero* electroporation, we analyzed an area in the middle neocortex spanning the cortical wall from the ventricular surface to the pia with a width of 80  $\mu\text{m}$ . For quantification of neurite outgrowth after *in utero* electroporation and after electroporation *in vitro*, GFP+ cells with a neurite length twice that long than the diameter of the cell body of the neuron were counted as neurite bearing cells as previously described

(Schachtrup et al., 2007). For *in vivo* and *in vitro* neurite outgrowth analyses after *in utero electroporation* at least 100 GFP+ neurons per condition were measured. For quantification of the number of GFP+ cells after *in utero electroporation*, GFP+ cells were counted in the cortical plate spanning an area with a width of 80  $\mu\text{m}$  (Fig. 6E, cortical plate. For quantification of the number of Ki67+ cells, EdU+/Ki67+, and PH3+ embryonic NSCs for cell proliferation and cell cycle length analyses, we analyzed an area in the caudal neocortex spanning the cortical wall from the ventricular surface to the pia with a width of 100  $\mu\text{m}$  (Ki67+ and EdU+/Ki67+ cells) and 400  $\mu\text{m}$  (pH3+ cells). At least three brain sections per animal were analyzed for cortical quantifications. For proliferation analyses *in vitro*, the diameter of at least 200 neurospheres and 200 BrdU-labeled embryonic NSCs were assessed. For apoptosis assays *in vitro* at least 200 embryonic NSCs per condition were analyzed.

### Supplementary References

- Ernsberger, U., Patzke, H. and Rohrer, H.** (1997). The developmental expression of choline acetyltransferase (ChAT) and the neuropeptide VIP in chick sympathetic neurons: evidence for different regulatory events in cholinergic differentiation. *Mech Dev* **68**, 115-126.
- Kowalczyk, T., Pontious, A., Englund, C., Daza, R. A., Bedogni, F., Hodge, R., Attardo, A., Bell, C., Huttner, W. B. and Hevner, R. F.** (2009). Intermediate neuronal progenitors (basal progenitors) produce pyramidal-projection neurons for all layers of cerebral cortex. *Cereb Cortex* **19**, 2439-2450.
- Magno, L., Oliveira, M. G., Mucha, M., Rubin, A. N. and Kessarlis, N.** (2012). Multiple embryonic origins of nitric oxide synthase-expressing GABAergic neurons of the neocortex. *Front Neural Circuits* **6**, 65.
- Schachtrup, C., Lu, P., Jones, L. L., Lee, J. K., Lu, J., Sachs, B. D., Zheng, B. and Akassoglou, K.** (2007). Fibrinogen inhibits neurite outgrowth via beta 3 integrin-mediated phosphorylation of the EGF receptor. *Proc Natl Acad Sci U S A* **104**, 11814-11819.
- Schachtrup, C., Ryu, J. K., Mammadzada, K., Khan, A. S., Carlton, P. M., Perez, A., Christian, F., Le Moan, N., Vagena, E., Baeza-Raja, B., et al.** (2015). Nuclear pore complex remodeling by p75(NTR) cleavage controls TGF-beta signaling and astrocyte functions. *Nat Neurosci* **18**, 1077-1080.

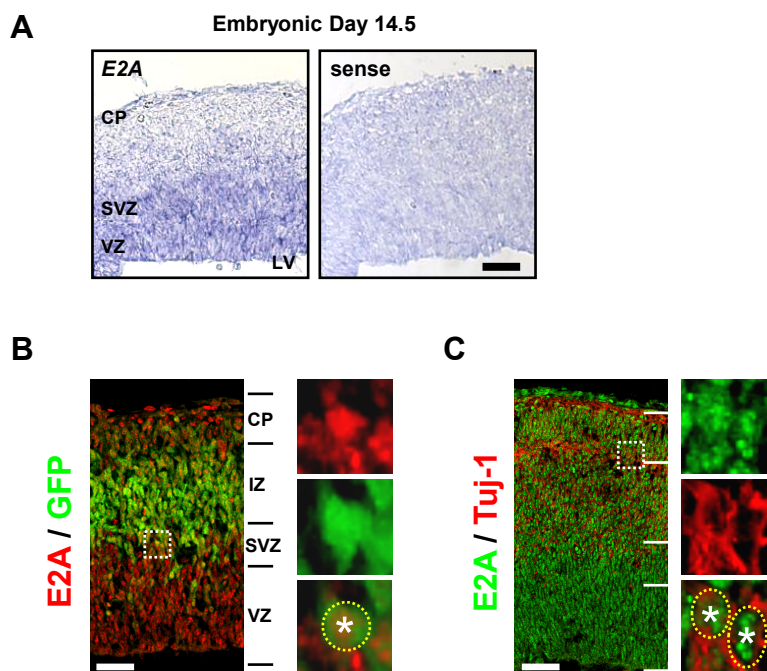

**Figure S1. Expression of E2A in intermediate precursor cells and postmitotic neurons during cortical development.** (A) *In situ* hybridization of E2A mRNA (blue) using antisense probe (A, left) and a sense control (A, right) of representative sagittal brain sections of C57BL/6 mice at E14.5. Scale bar: 200  $\mu$ m. ( $n = 3$ ). (B) Immunolabeling for E2A (red) in the cortex in representative sagittal brain sections of Eomes<sup>GFP</sup> mice at E14.5. Eomes<sup>GFP</sup> expressing cells can be identified by green fluorescence. Scale bar: 50  $\mu$ m. ( $n = 3$  mice). (C) Immunolabeling for E2A (green) in combination with Tuj-1 (red) in the cortex in representative sagittal brain sections of C57BL/6 mice at E14.5. White boxes indicate representative E2A colocalization with GFP+ (A) and Tuj-1+ (B) cells (high magnification images at the right, respectively). Scale bar: 50  $\mu$ m. ( $n = 3$  mice). Abbreviations: CP, cortical plate; IZ, intermediate zone; SVZ, subventricular zone; VZ, ventricular zone.

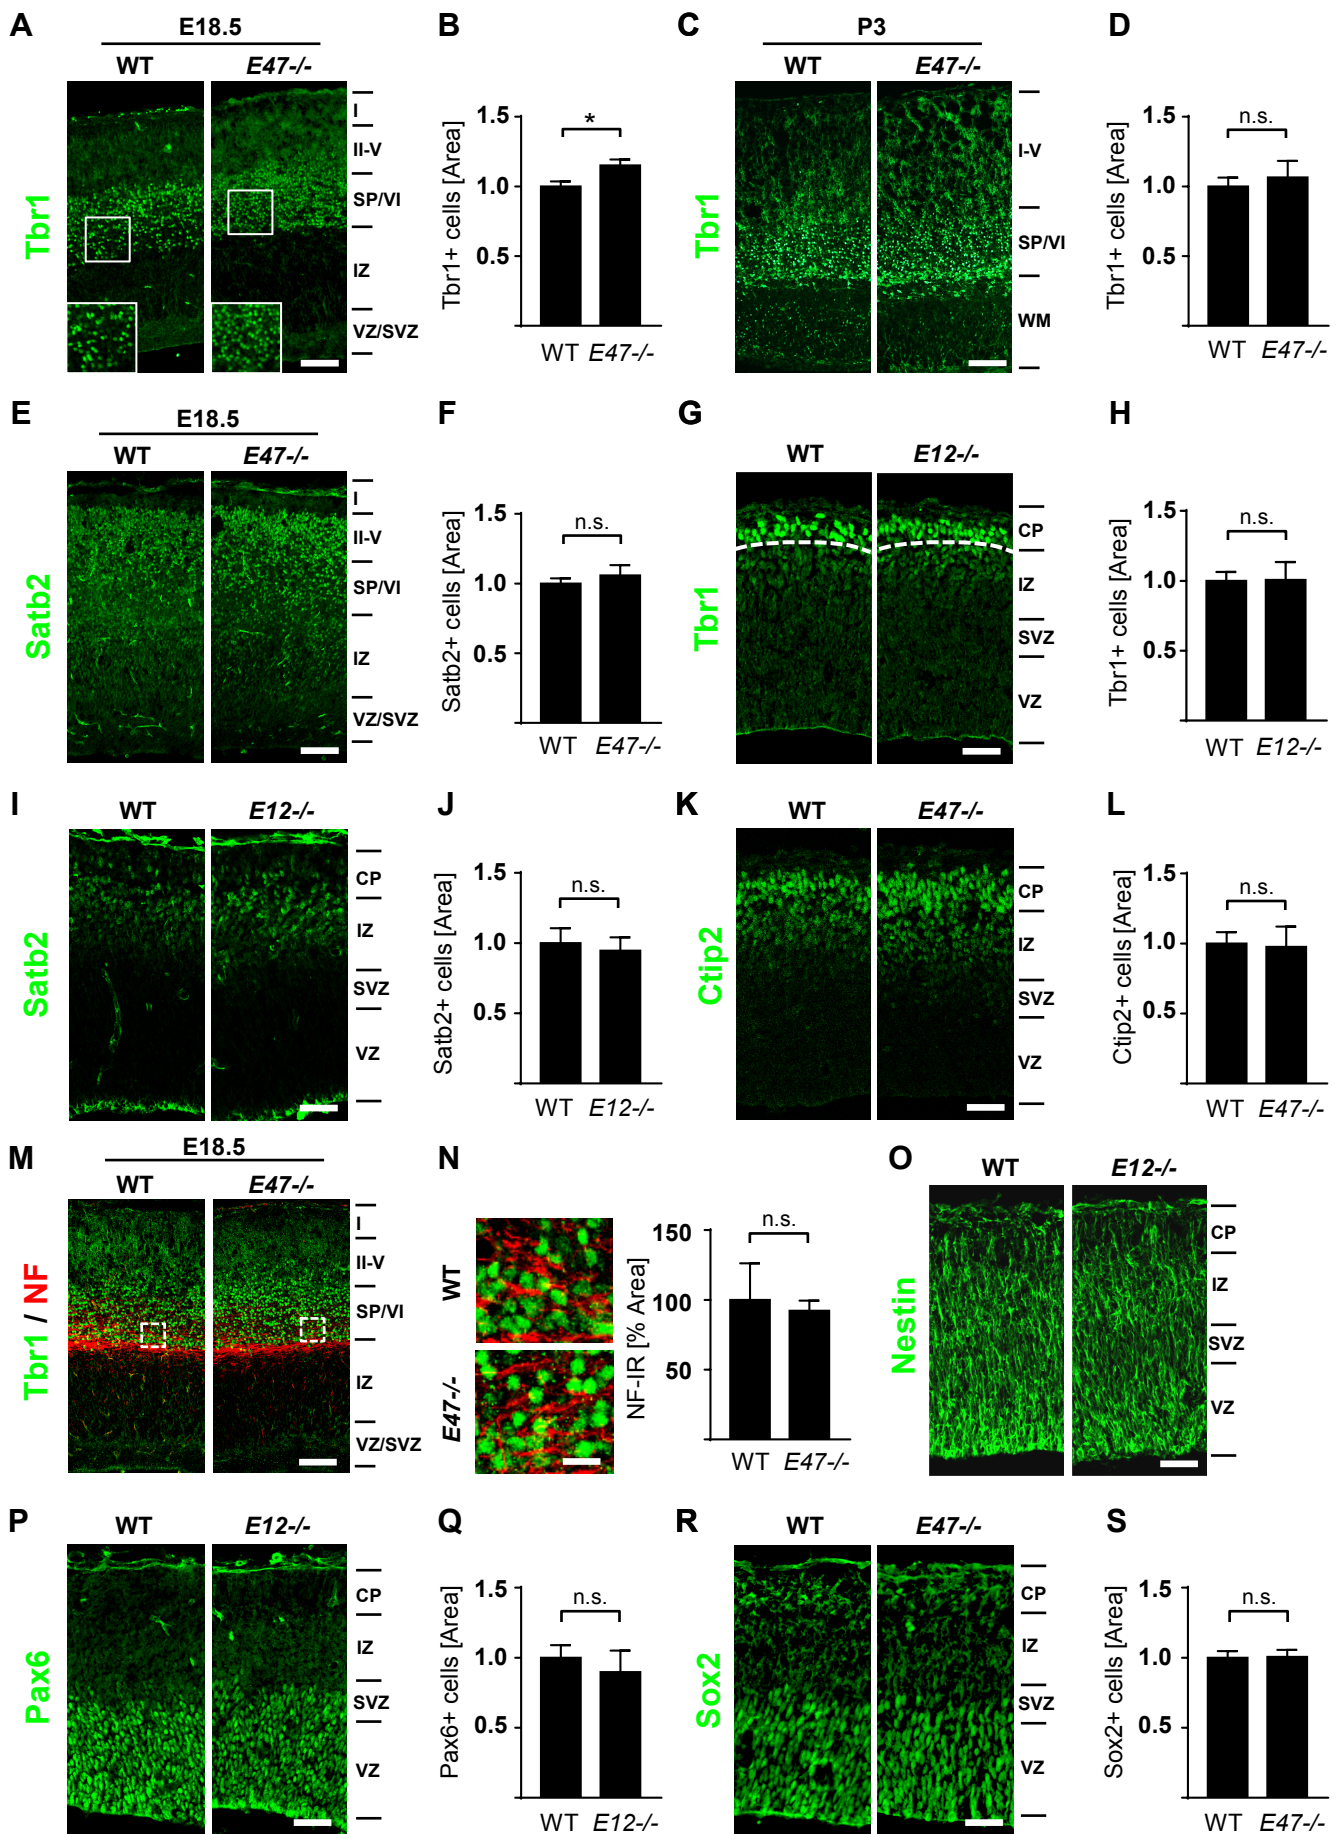



**Figure S2. E12 does not regulate deep-layer or upper-layer neurogenesis at E14.5.**

(A,C) Immunolabeling for Tbr1 (green) in sagittal brain sections of *E47*<sup>-/-</sup> mice compared to WT littermates at E18.5 (A) and P3 (C). Scale bar: 110  $\mu$ m. (B,D) Quantification of the number of Tbr1<sup>+</sup> neurons ( $n = 4$  mice, B;  $n = 4$  WT mice,  $n = 3$  *E47*<sup>-/-</sup> mice, D). (E) Immunolabeling for Satb2 (green) in sagittal brain sections of *E47*<sup>-/-</sup> mice compared to WT littermates at E18.5. Scale bar: 110  $\mu$ m. (F) Quantification of the number of Satb2<sup>+</sup> cells ( $n = 4$  mice). (G,I) Immunolabeling for Tbr1 (G, green) and Satb2 (I, green) in sagittal brain sections of *E12*<sup>-/-</sup> mice compared to WT littermates at E14.5. Scale bar: 40  $\mu$ m. (H,J) Quantification of the number of Tbr1<sup>+</sup> (H) and Satb2<sup>+</sup> (J) neurons ( $n = 5$  WT mice,  $n = 3$  *E12*<sup>-/-</sup> mice, H;  $n = 4$  WT mice,  $n = 3$  *E12*<sup>-/-</sup> mice, J). (K) Immunolabeling for Ctip2 (green) in the cortex in sagittal sections of *E47*<sup>-/-</sup> mice at E14.5. Scale bar: 40  $\mu$ m. (L) Quantification of the number of Ctip2<sup>+</sup> subcortical projection neurons in cortical brain sections of *E47*<sup>-/-</sup> mice and WT littermates at E14.5 ( $n = 4$  WT mice,  $n = 5$  *E47*<sup>-/-</sup> mice). (M) Immunolabeling for Tbr1 (green) and neurofilament (red) in sagittal brain sections of *E47*<sup>-/-</sup> mice compared to WT littermates at E18.5. Enlargements of regions indicated by rectangles represent area of quantification. Scale bars: 110  $\mu$ m (M), 17  $\mu$ m (N). (N) Quantification of the immunoreactivity of neurofilament ( $n = 3$  mice). (O) Immunolabeling for Nestin (green) in the cortex in representative sagittal sections of *E12*<sup>-/-</sup> mice at E14.5 ( $n = 3$  mice). Scale bar: 40  $\mu$ m. (P) Immunolabeling for Pax6 (green) in the cortex in sagittal sections of *E12*<sup>-/-</sup> mice at E14.5. Scale bar: 40  $\mu$ m. (Q) Quantification of the number of Pax6<sup>+</sup> radial glial cells in cortical brain sections of *E12*<sup>-/-</sup> mice and WT littermates at E14.5 ( $n = 5$  WT mice,  $n = 3$  *E12*<sup>-/-</sup> mice). (R) Immunolabeling for Sox2 (green) in the cortex in sagittal sections of *E47*<sup>-/-</sup> mice at E14.5. Scale bar: 40  $\mu$ m. (S) Quantification of the number of Sox2<sup>+</sup> radial glial and intermediate progenitor cells in cortical brain sections of *E47*<sup>-/-</sup>

mice and WT littermates at E14.5 ( $n = 7$  WT mice,  $n = 6$  *E47*<sup>-/-</sup> mice). Bar graphs are mean  $\pm$  s.e.m. \* $P < 0.05$  calculated by Student's *t* test. Abbreviations: CP, cortical plate; SP, subplate; IZ, intermediate zone; NF, neurofilament; SVZ, subventricular zone; VZ, ventricular zone, WM, white matter.



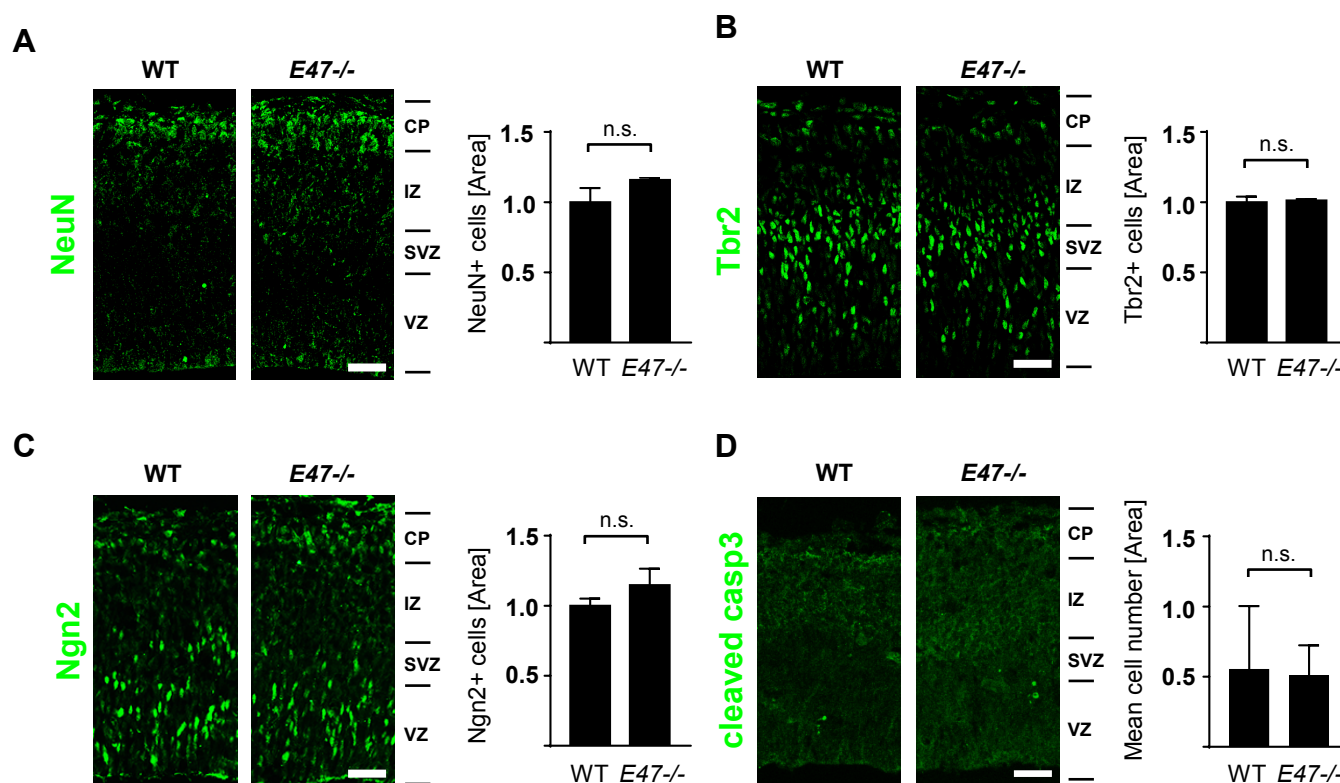

**Figure S3. Distribution of intermediate precursor cells and postmitotic neurons in**

***E47*<sup>-/-</sup> cortices at E14.5.** (A) Immunolabeling for NeuN (green) in the cortex in sagittal

brain sections of *E47*<sup>-/-</sup> mice at E14.5 (left, A) and quantification of NeuN<sup>+</sup> cells in the cortical area (right, A). Scale bar: 40  $\mu$ m. ( $n = 3$  mice).

(B) Immunolabeling for Tbr2 (green) in the cortex in sagittal brain sections of *E47*<sup>-/-</sup> mice and WT littermates at E14.5

(left, B) and quantification of Tbr2<sup>+</sup> cells in the cortical area (right, B). Scale bar: 40  $\mu$ m.

( $n = 4$  WT mice,  $n = 3$  *E47*<sup>-/-</sup> mice). (C) Immunolabeling for Ngn2 (green) in the cortex

in sagittal brain sections of *E47*<sup>-/-</sup> mice and WT littermates at E14.5 (left, C) and

quantification of Ngn2<sup>+</sup> cells in the cortical area (right, C). Scale bar: 40  $\mu$ m. ( $n = 6$  WT

mice,  $n = 6$  *E47*<sup>-/-</sup> mice). (D) Immunolabeling for cleaved caspase-3 (green) in the cortex

in sagittal brain sections of *E47*<sup>-/-</sup> mice and WT littermates at E14.5 (left, D) and

quantification of cleaved caspase-3<sup>+</sup> cells in the cortical area (right, D). Scale bar: 40  $\mu$ m.

( $n = 2$  WT mice,  $n = 2$  *E47*<sup>-/-</sup> mice). Bar graphs are mean  $\pm$  s.e.m.  $p$ -values were

calculated by Student's  $t$  test. Abbreviations: CP, cortical plate; IZ, intermediate zone;

SVZ, subventricular zone; VZ, ventricular zone.

**A Coverage at E2A sites in NSCs**

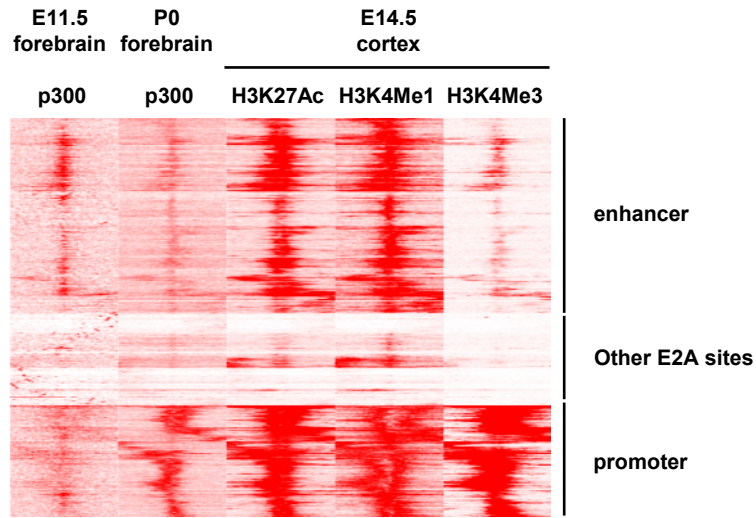

**B**

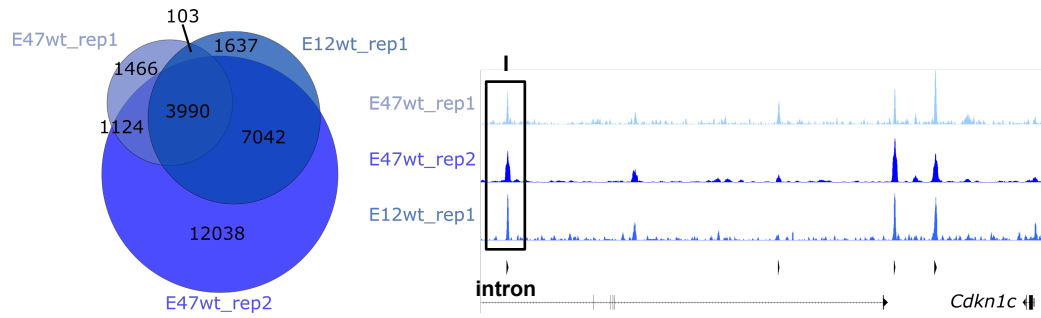

**C**

**NeuroD2 coverage around E2A peaks**

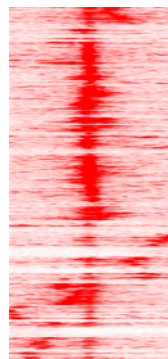

**D**

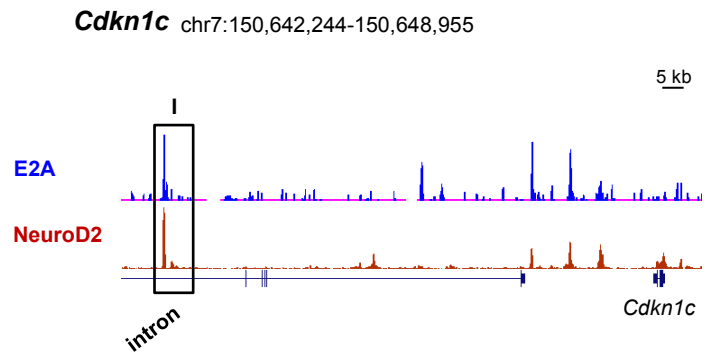

**Figure S4. E2A binds predominantly to active enhancer and promoter in neuronal tissue, partially sharing binding sites with NeuroD2.**

(A) Comparative analysis of genome-wide enrichment of p300 (Visel et al., 2013) and H3K4Me1, H3K4Me3 and H3K27Ac histone marks (Shen et al., 2012) around E2A binding sites in embryonic NSCs (our study). Epigenetic signatures distinguish active enhancers (H3K27Ac/H3K4Me1<sup>high</sup>/H3K4Me3<sup>low</sup>) from promoter regions (H3K27Ac/H3K4Me1<sup>low</sup>/H3K4Me3<sup>high</sup>). Note that, at promoter regions H3K4Me1 was low and H3K4Me3 was high around the peak center of E2A binding, while H3K4Me1 was preferentially increased in the surrounding regions. (B) E2A ChIP-Seq reproducibility in WT embryonic NSCs. The Venn diagram depicts the E2A binding sites identified in 3 independent ChIP-Seq experiments. Binding sites are called "reproducible" when they were identified in 2 out of 3 experiments (FDR<0.01). The ChIP-Seq tracks for the *Cdkn1c* locus show 4 reproducibly identified E2A binding sites (black arrow heads). One of those being the functional E47 enhancer in the intron of *Kcnq1* (black box I). (C,D) Genome-wide coverage of NeuroD2 binding events (Bayam et al., 2015) around E2A binding sites in embryonic NSCs (C) including the identified poised enhancer p-57 I located in the *Cdkn1c* locus (D).

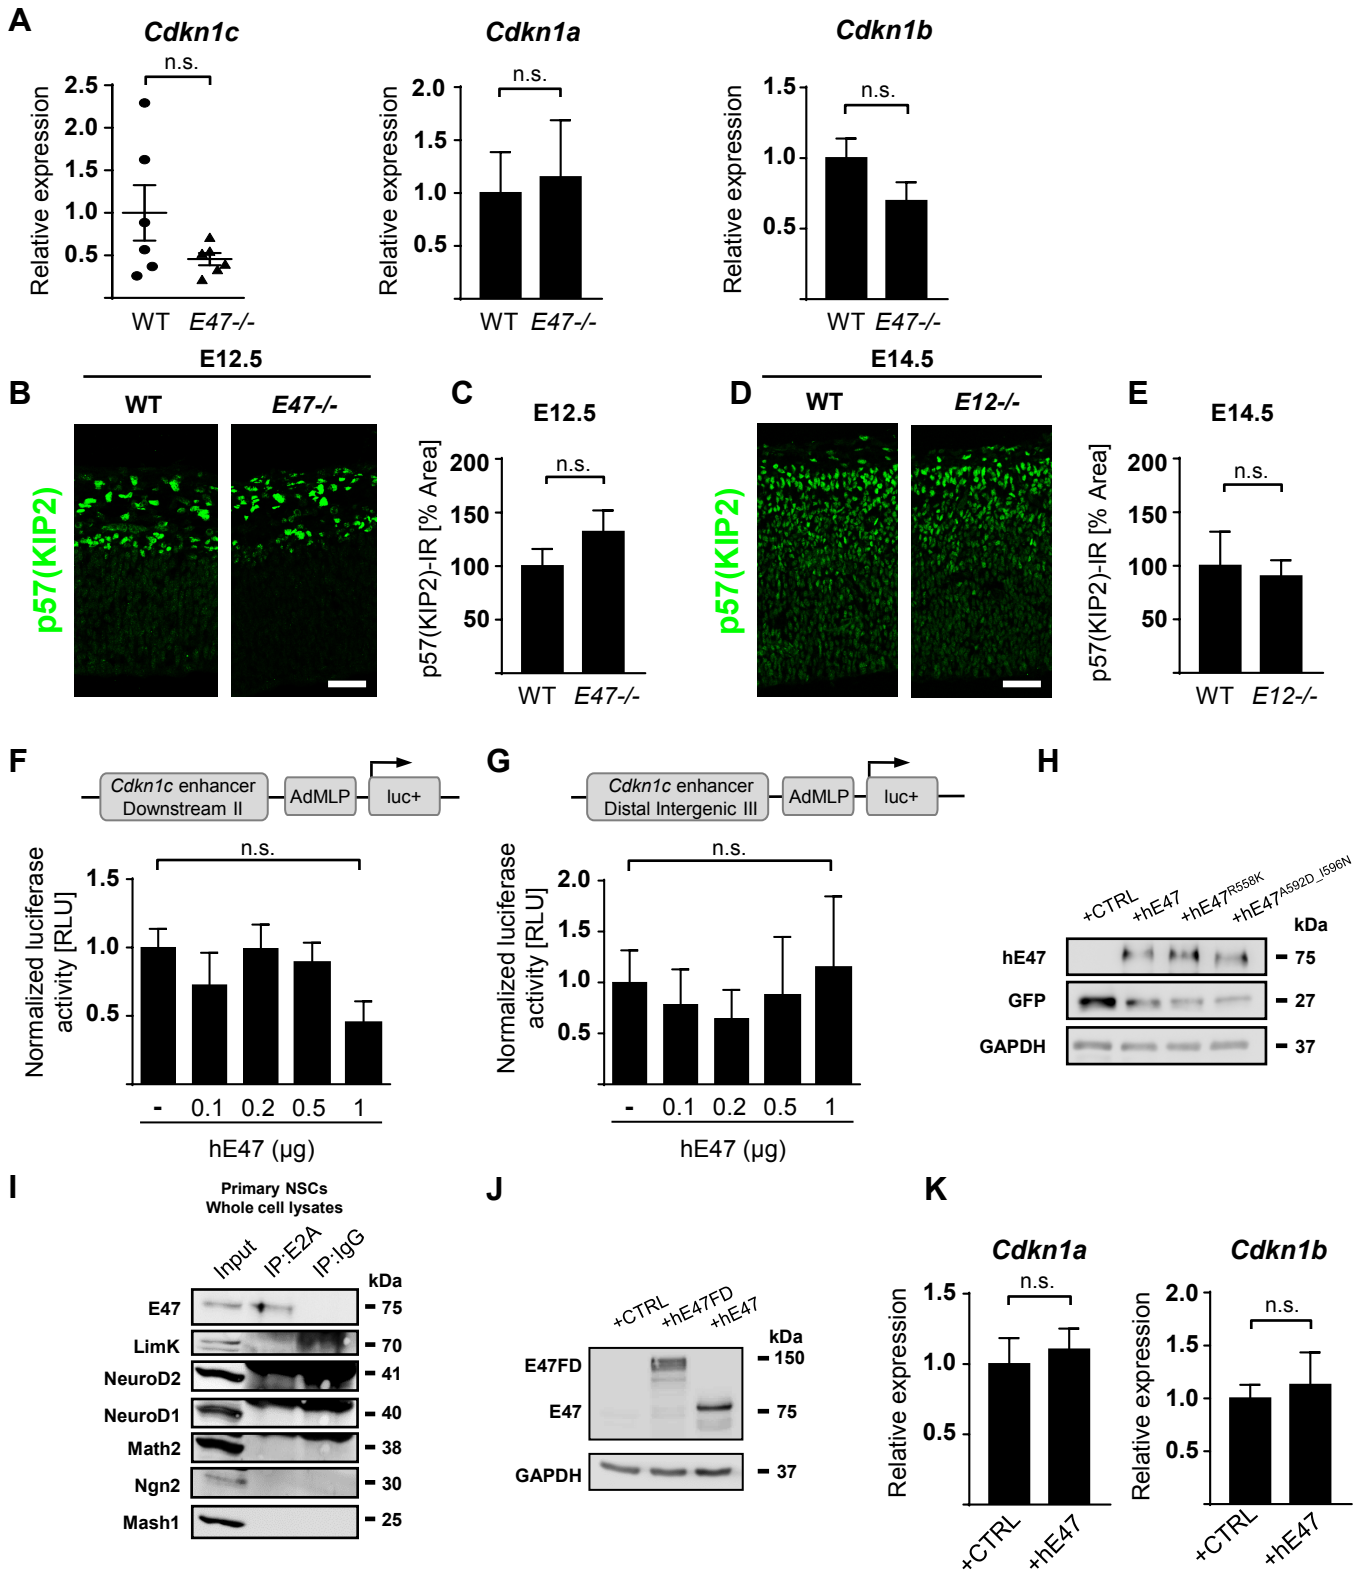

**Figure S5. E47 does not regulate mRNA expression of *Cdkn1a* and *Cdkn1b* in embryonic NSCs.** (A) Expression of *Cdkn1c*, *Cdkn1a*, and *Cdkn1b* mRNA in embryonic WT and *E47*<sup>-/-</sup> NSCs under proliferation conditions. Quantitative PCR results are of four independent experiments performed in duplicate. (B) Immunolabeling for p57(KIP2) (green) in sagittal brain sections of *E47*<sup>-/-</sup> mice compared to WT littermates at E12.5. Scale bar: 40  $\mu$ m. (C) Quantification of the p57(KIP2) immunoreactivity ( $n = 3$  WT mice,  $n = 4$  *E47*<sup>-/-</sup> mice). (D) Immunolabeling for p57(KIP2) (green) in sagittal brain sections of *E12*<sup>-/-</sup> mice compared to WT littermates at E14.5. Scale bar: 40  $\mu$ m. (E) Quantification of the p57(KIP2) immunoreactivity ( $n = 3$  WT mice,  $n = 3$  *E12*<sup>-/-</sup> mice). (F,G) Luciferase reporter assay in HEK293T cells using the indicated p57(KIP2) luciferase reporter construct (F, *Cdkn1c* enhancer II termed as downstream) and (G, *Cdkn1c* enhancer III termed as distal intergenic). Luciferase reporter assay results are of three independent experiments performed in duplicate. (H) Immunoblot protein expression analysis for E47 in FACS sorted mouse embryonic NSCs 24 h after electroporation with WT hE47<sup>WT</sup>-IRES-eGFP, mutant hE47<sup>R558K</sup>-IRES-eGFP and mutant hE47<sup>A592D\_I596N</sup>-IRES-eGFP plasmid. Representative Western blots are shown from two independent experiments. (I) Endogenous coimmunoprecipitation of E47 with potential interaction partners in whole embryonic NSC lysates. Representative immunoblots are shown from two independent experiments. (J) Immunoblot protein expression analysis for hE47 forced homodimer (hE47<sup>FD</sup>) in HEK293T cells 24 h after transfection with hE47<sup>FD</sup>-pMIG plasmid. Representative Western blots are shown from two independent experiments. (K) Expression of *Cdkn1a* mRNA (left) and *Cdkn1b* mRNA (right) in embryonic NSCs 24 h after electroporation with hE47<sup>WT</sup>-IRES-eGFP plasmid in comparison to cells electroporated with pCAGGs-IRES-eGFP control plasmid determined by quantitative PCR and normalized to *GAPDH*. Quantitative PCR results are of six independent experiments performed in duplicate. Bar graphs are mean  $\pm$  s.e.m.  $p$ -values were calculated by Student's  $t$  test (A,C,E,K) or by one-way ANOVA (F,G)]. Abbreviations: CDKI, cyclin-dependent kinase inhibitor protein; RLU, relative light unit.

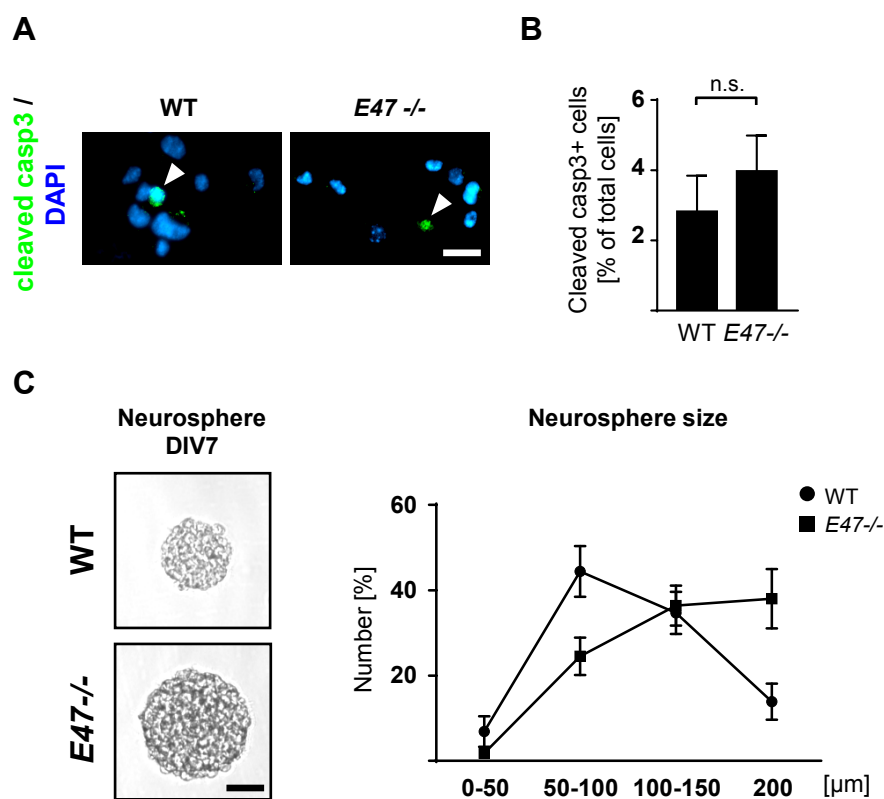

**Figure S6. E47-deficiency does not affect apoptotic cell death but neurosphere size of embryonic NSCs *in vitro*.** (A,B) Immunolabeling for cleaved caspase-3 (green) of *E47*<sup>-/-</sup> and WT embryonic NSCs (A) and quantification of cleaved caspase-3+ cells (B). Scale bar: 20 μm. Apoptotic cell death results are of three independent experiments. (C) Distribution of the diameter of individual formed neurospheres from *E47*<sup>-/-</sup> and WT dissociated primary NSCs after 7 DIV in proliferation medium. *E47*<sup>-/-</sup> embryonic NSCs formed increased numbers of bigger size neurospheres (200 μm), but less medium size neurospheres (50-100 μm) compared to WT NSCs. Scale bar: 40 μm. Neurosphere size results are of three independent experiments. Values are mean ± s.e.m. *p*-values were calculated by Student's *t* test (B).

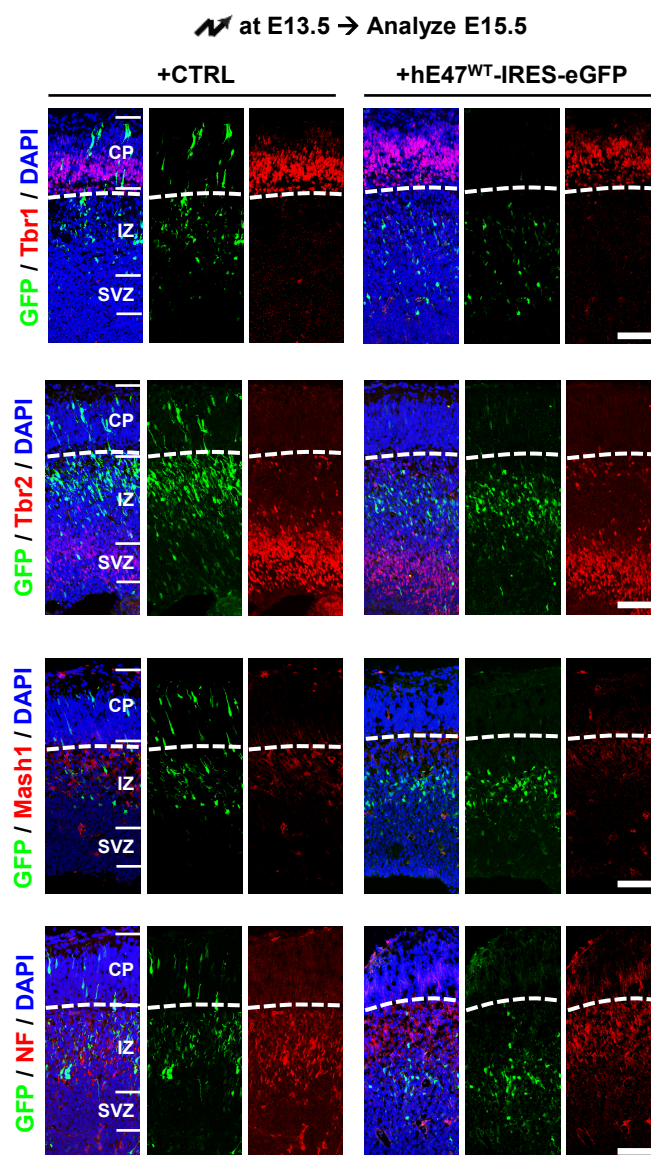

**Figure S7. E47 overexpressing cells show a failure in lower layer neuron differentiation.** *In utero* electroporation of WT mice at E13.5 with either pCAGGs-IRES-eGFP or hE47<sup>WT</sup>-IRES-eGFP. Immunolabeling was performed for Tbr1 (red, deep-layer neuron marker, top row), Tbr2 (red, intermediate progenitor cells, second top row), Mash1 (red, ventral telencephalon neuron, second bottom row), neurofilament (red, projecting axons, bottom) in combination with GFP (green, electroporated cells) in sagittal brain sections at E15.5. Scale bars: 80  $\mu$ m (left), Nuclei are stained with DAPI (blue). Abbreviations: CP, cortical plate; IZ, intermediate zone; NF, neurofilament; SVZ, subventricular zone.



**Table S1:** Overlapping differentially expressed genes in *E12*<sup>-/-</sup> and *E47*<sup>-/-</sup> primary embryonic NSCs having an E2A binding site in WT cells. Depicted are the results from RNA-Seq indicating the fold-change in gene expression as log<sub>2</sub> (log<sub>2</sub>FC) in *E47*<sup>-/-</sup> or *E12*<sup>-/-</sup> NSCs, variance between triplicates as P.

| Symbol              | log <sub>2</sub> FC <i>E47</i> <sup>-/-</sup> -P <i>E47</i> <sup>-/-</sup> | log <sub>2</sub> FC <i>E12</i> <sup>-/-</sup> -P <i>E12</i> <sup>-/-</sup> |                 |
|---------------------|----------------------------------------------------------------------------|----------------------------------------------------------------------------|-----------------|
| Tdg<br>120          | -1.75                                                                      | 5.15E-45                                                                   | -1.64<br>1.39E- |
| Csmd3<br>01         | -1.23                                                                      | 7.20E-03                                                                   | -0.60<br>2.03E- |
| Ckmt1<br>02         | -1.14                                                                      | 5.40E-03                                                                   | -0.72<br>6.99E- |
| 1190007I07Rik<br>04 | -1.07                                                                      | 3.65E-05                                                                   | -1.00<br>3.40E- |
| Adams3<br>12        | -1.06                                                                      | 4.05E-04                                                                   | -0.84<br>9.06E- |
| Coll1a1<br>13       | -1.05                                                                      | 1.87E-01                                                                   | -1.85<br>6.19E- |
| Plppr5<br>04        | -0.97                                                                      | 3.13E-03                                                                   | -0.86<br>4.49E- |
| Pcdh15<br>03        | -0.96                                                                      | 3.15E-03                                                                   | -1.32<br>7.25E- |
| Cntn1<br>02         | -0.90                                                                      | 2.87E-05                                                                   | -0.96<br>1.98E- |
| Plppr1<br>04        | -0.90                                                                      | 3.37E-04                                                                   | -0.97<br>1.57E- |
| Moxd1<br>03         | -0.86                                                                      | 9.05E-02                                                                   | -1.45<br>5.06E- |
| Brinp1<br>02        | -0.86                                                                      | 3.70E-02                                                                   | -1.18<br>1.10E- |
| Unc5c<br>02         | -0.84                                                                      | 1.87E-02                                                                   | -0.80<br>1.48E- |
| Dpp10<br>01         | -0.83                                                                      | 2.82E-03                                                                   | -1.20<br>1.43E- |
| Clic5<br>03         | -0.81                                                                      | 2.06E-02                                                                   | 0.84<br>2.29E-  |
| Ptpn5<br>03         | -0.80                                                                      | 3.94E-03                                                                   | -0.97<br>2.86E- |
| Grik3<br>02         | -0.78                                                                      | 2.06E-05                                                                   | -0.95<br>1.39E- |
| Shisa7<br>01        | -0.73                                                                      | 8.15E-03                                                                   | -0.99<br>1.27E- |



|                     |       |          |       |        |
|---------------------|-------|----------|-------|--------|
| Hmcn1<br>04         | -0.72 | 5.81E-02 | 0.69  | 2.92E- |
| Nkd2<br>03          | -0.72 | 7.53E-02 | -0.63 | 6.61E- |
| Kcnq2<br>02         | -0.71 | 9.02E-02 | -1.13 | 2.10E- |
| Gabrb2<br>03        | -0.70 | 2.23E-02 | -0.85 | 4.36E- |
| Cobl<br>02          | -0.70 | 1.82E-01 | -0.67 | 3.18E- |
| Spo11<br>06         | -0.69 | 1.60E-01 | -1.43 | 6.96E- |
| Vat1l<br>02         | -0.67 | 9.92E-02 | -1.12 | 9.67E- |
| Cntnap5b<br>03      | -0.66 | 2.16E-02 | -0.74 | 9.49E- |
| B3gat2<br>03        | -0.66 | 2.07E-03 | -0.74 | 6.41E- |
| Atp10b<br>02        | -0.66 | 1.24E-01 | -0.88 | 2.40E- |
| Ppfia2<br>02        | -0.65 | 9.62E-02 | -0.71 | 1.45E- |
| 3110035E14Rik<br>03 | -0.65 | 9.81E-02 | -1.37 | 3.46E- |
| Gm3739<br>02        | -0.65 | 1.34E-01 | -0.65 | 6.95E- |
| Stk32a<br>02        | -0.63 | 5.19E-02 | -1.81 | 1.66E- |
| AW551984<br>02      | -0.63 | 6.08E-02 | -0.59 | 9.32E- |
| Ugt8a<br>02         | -0.63 | 4.09E-02 | -0.71 | 1.14E- |
| Hrk<br>01           | -0.61 | 3.65E-01 | -0.60 | 1.16E- |
| Clgn<br>03          | -0.61 | 1.62E-01 | -0.71 | 4.93E- |
| Slc1a1<br>02        | -0.61 | 1.18E-01 | -1.04 | 2.88E- |
| Rasgrp3<br>02       | -0.60 | 3.99E-01 | 0.61  | 4.45E- |
| Tenm2<br>03         | -0.59 | 6.81E-02 | -1.07 | 1.06E- |
| Chrm1<br>02         | -0.58 | 1.44E-01 | -0.69 | 2.00E- |
| Dmbx1<br>02         | -0.58 | 3.05E-01 | 0.87  | 1.20E- |

|                |       |           |       |        |
|----------------|-------|-----------|-------|--------|
| Nefl<br>02     | -0.58 | 3.33E-01  | -0.90 | 1.76E- |
| Kif5c<br>03    | -0.58 | 5.28E-02  | -0.63 | 4.11E- |
| Cdo1<br>04     | 0.63  | 2.51E-01  | -0.94 | 9.17E- |
| Tnfaip2<br>02  | 0.67  | 2.87E-01  | -0.59 | 8.87E- |
| Dscaml1<br>03  | 0.68  | 2.90E-01  | -0.91 | 1.83E- |
| Plp1<br>03     | 0.71  | 2.04E-01  | -0.70 | 4.63E- |
| Junb<br>02     | 0.78  | 3.92E-02  | 0.86  | 3.27E- |
| Ky<br>02       | 1.08  | 3.30E-02  | 0.68  | 6.99E- |
| Thy1<br>02     | 1.14  | 3.93E-02  | 0.67  | 3.19E- |
| Selenbp1<br>02 | 1.14  | 5.20E-02  | -0.61 | 5.45E- |
| Agt<br>04      | 1.16  | 1.56E-01  | 1.11  | 1.61E- |
| Cacng5<br>02   | 1.19  | 1.06E-02  | 0.72  | 1.25E- |
| Als2cl<br>04   | 1.21  | 2.22E-02  | 0.69  | 5.20E- |
| Sox10<br>01    | 1.25  | 5.10E-02  | -1.29 | 1.01E- |
| Six3os1<br>01  | 1.47  | 3.79E-01  | -1.07 | 6.03E- |
| Slc30a10<br>02 | 1.57  | 4.68E-02  | -0.62 | 3.63E- |
| Ndr2<br>02     | 1.67  | 1.42E-01  | -1.05 | 1.17E- |
| Emp1<br>02     | 2.04  | 9.43E-02  | -0.71 | 1.02E- |
| Gm9855<br>214  | 6.76  | 7.57E-111 | 6.92  | 7.96E- |

**Table S2:** Differentially expressed genes in *E47*<sup>-/-</sup> primary embryonic NSCs having an E2A binding site in WT cells. Depicted are the results from RNA-Seq indicating the fold-change in gene expression as log<sub>2</sub> (log<sub>2</sub>FC), variance between triplicates as P or Benjamin-Hochberg adjusted P value (adjP).

| ensembl            | log <sub>2</sub> FC | P        | adjP     | Symbol        |
|--------------------|---------------------|----------|----------|---------------|
| ENSMUSG00000034674 | -1.75               | 5.15E-45 | 3.31E-41 | Tdg           |
| ENSMUSG00000063320 | -1.07               | 3.65E-05 | 4.26E-02 | 1190007I07Rik |
| ENSMUSG00000043635 | -1.06               | 4.05E-04 | 2.89E-01 | Adamts3       |
| ENSMUSG00000001506 | -1.05               | 1.87E-01 | 9.99E-01 | Coll1a1       |
| ENSMUSG00000022206 | -0.97               | 1.15E-01 | 9.99E-01 | Npr3          |
| ENSMUSG00000052613 | -0.96               | 3.15E-03 | 9.20E-01 | Pcdh15        |
| ENSMUSG00000063446 | -0.90               | 3.37E-04 | 2.57E-01 | Plppr1        |
| ENSMUSG00000030222 | -0.90               | 3.71E-02 | 9.99E-01 | Rerg          |
| ENSMUSG00000068373 | -0.88               | 7.73E-02 | 9.99E-01 | D430041D05Rik |
| ENSMUSG00000020000 | -0.86               | 9.05E-02 | 9.99E-01 | Moxd1         |
| ENSMUSG00000029334 | -0.85               | 3.56E-03 | 9.58E-01 | Prkg2         |
| ENSMUSG00000036815 | -0.83               | 2.82E-03 | 9.20E-01 | Dpp10         |
| ENSMUSG00000049252 | -0.82               | 1.26E-03 | 6.72E-01 | Lrp1b         |
| ENSMUSG00000030854 | -0.80               | 3.94E-03 | 9.68E-01 | Ptpn5         |
| ENSMUSG00000041670 | -0.76               | 3.05E-03 | 9.20E-01 | Rims1         |
| ENSMUSG00000066842 | -0.72               | 5.81E-02 | 9.99E-01 | Hmcn1         |
| ENSMUSG00000046500 | -0.71               | 6.18E-02 | 9.99E-01 | Fam19a4       |
| ENSMUSG00000033147 | -0.71               | 1.97E-02 | 9.99E-01 | Slc22a15      |
| ENSMUSG00000020173 | -0.70               | 1.82E-01 | 9.99E-01 | Cobl          |
| ENSMUSG00000005883 | -0.69               | 1.60E-01 | 9.99E-01 | Spo11         |
| ENSMUSG00000026748 | -0.68               | 1.07E-06 | 2.75E-03 | Plxdc2        |
| ENSMUSG00000071424 | -0.67               | 1.08E-01 | 9.99E-01 | Grid2         |
| ENSMUSG00000063434 | -0.67               | 8.20E-03 | 9.99E-01 | Sorcs3        |
| ENSMUSG00000064293 | -0.67               | 2.14E-02 | 9.99E-01 | Cntn4         |
| ENSMUSG00000020181 | -0.67               | 1.41E-02 | 9.99E-01 | Nav3          |
| ENSMUSG00000067028 | -0.66               | 2.16E-02 | 9.99E-01 | Cntnap5b      |
| ENSMUSG00000047261 | -0.66               | 1.43E-01 | 9.99E-01 | Gap43         |
| ENSMUSG00000053825 | -0.65               | 9.62E-02 | 9.99E-01 | Ppfi2         |
| ENSMUSG00000008658 | -0.65               | 2.75E-01 | 9.99E-01 | Rbfox1        |
| ENSMUSG00000073805 | -0.65               | 2.57E-02 | 9.99E-01 | Fam196a       |
| ENSMUSG00000030077 | -0.64               | 2.46E-01 | 9.99E-01 | Chl1          |
| ENSMUSG00000056758 | -0.64               | 9.09E-02 | 9.99E-01 | Hmga2         |
| ENSMUSG00000022021 | -0.63               | 3.53E-06 | 7.56E-03 | Diaph3        |
| ENSMUSG00000039954 | -0.63               | 5.19E-02 | 9.99E-01 | Stk32a        |
| ENSMUSG00000000296 | -0.62               | 5.13E-02 | 9.99E-01 | Tpd52l1       |
| ENSMUSG00000037855 | -0.62               | 2.31E-02 | 9.99E-01 | Zfp365        |
| ENSMUSG00000044770 | -0.61               | 2.91E-01 | 9.99E-01 | Scml4         |

|                    |       |          |          |               |
|--------------------|-------|----------|----------|---------------|
| ENSMUSG00000022894 | -0.61 | 5.00E-02 | 9.99E-01 | Adamts5       |
| ENSMUSG00000009628 | -0.61 | 2.01E-01 | 9.99E-01 | Tex15         |
| ENSMUSG00000038168 | -0.61 | 2.26E-01 | 9.99E-01 | P3h2          |
| ENSMUSG00000024935 | -0.61 | 1.18E-01 | 9.99E-01 | Slc1a1        |
| ENSMUSG00000046159 | -0.60 | 1.34E-01 | 9.99E-01 | Chrm3         |
| ENSMUSG00000035150 | -0.60 | 4.34E-03 | 9.96E-01 | Eif2s3x       |
| ENSMUSG00000071042 | -0.60 | 3.99E-01 | 9.99E-01 | Rasgrp3       |
| ENSMUSG00000032024 | -0.60 | 6.52E-02 | 9.99E-01 | Clmp          |
| ENSMUSG00000049336 | -0.59 | 6.81E-02 | 9.99E-01 | Tenm2         |
| ENSMUSG00000030022 | -0.59 | 1.11E-01 | 9.99E-01 | Adamts9       |
| ENSMUSG00000026514 | -0.59 | 4.56E-02 | 9.99E-01 | Cnih3         |
| ENSMUSG00000079410 | -0.59 | 1.96E-01 | 9.99E-01 | Gm2897        |
| ENSMUSG00000026764 | -0.58 | 5.28E-02 | 9.99E-01 | Kif5c         |
| ENSMUSG00000035342 | 0.58  | 2.35E-02 | 9.99E-01 | Lzts2         |
| ENSMUSG00000031661 | 0.58  | 2.37E-01 | 9.99E-01 | Nkd1          |
| ENSMUSG00000035547 | 0.58  | 1.16E-01 | 9.99E-01 | Capn5         |
| ENSMUSG00000044164 | 0.59  | 2.09E-01 | 9.99E-01 | Rnf182        |
| ENSMUSG00000035891 | 0.59  | 1.63E-01 | 9.99E-01 | Cerk          |
| ENSMUSG00000020263 | 0.59  | 1.69E-01 | 9.99E-01 | Appl2         |
| ENSMUSG00000026923 | 0.60  | 5.18E-02 | 9.99E-01 | Notch1        |
| ENSMUSG00000044197 | 0.60  | 2.55E-01 | 9.99E-01 | Gpr146        |
| ENSMUSG00000020893 | 0.60  | 1.34E-01 | 9.99E-01 | Per1          |
| ENSMUSG00000022425 | 0.60  | 2.70E-01 | 9.99E-01 | Enpp2         |
| ENSMUSG00000047085 | 0.60  | 4.94E-02 | 9.99E-01 | Lrrc4b        |
| ENSMUSG00000018451 | 0.61  | 1.49E-01 | 9.99E-01 | 6330403K07Rik |
| ENSMUSG00000046961 | 0.61  | 3.23E-01 | 9.99E-01 | Gpr156        |
| ENSMUSG00000037003 | 0.61  | 1.17E-01 | 9.99E-01 | Tns2          |
| ENSMUSG00000039095 | 0.61  | 1.25E-01 | 9.99E-01 | En2           |
| ENSMUSG00000022122 | 0.61  | 1.92E-01 | 9.99E-01 | Ednrb         |
| ENSMUSG00000055652 | 0.61  | 6.88E-02 | 9.99E-01 | Klhl25        |
| ENSMUSG00000030986 | 0.61  | 9.15E-02 | 9.99E-01 | Dhx32         |
| ENSMUSG00000068099 | 0.61  | 2.87E-01 | 9.99E-01 | 1500009C09Rik |
| ENSMUSG00000029723 | 0.61  | 1.40E-01 | 9.99E-01 | Tsc22d4       |
| ENSMUSG00000032204 | 0.61  | 2.11E-01 | 9.99E-01 | Aqp9          |
| ENSMUSG00000048001 | 0.62  | 6.11E-02 | 9.99E-01 | Hes5          |
| ENSMUSG00000021250 | 0.62  | 1.23E-01 | 9.99E-01 | Fos           |
| ENSMUSG00000044786 | 0.62  | 1.31E-01 | 9.99E-01 | Zfp36         |
| ENSMUSG00000021806 | 0.62  | 2.21E-02 | 9.99E-01 | Nid2          |
| ENSMUSG00000028756 | 0.62  | 1.40E-01 | 9.99E-01 | Pink1         |
| ENSMUSG00000021453 | 0.62  | 8.16E-02 | 9.99E-01 | Gadd45g       |
| ENSMUSG00000029049 | 0.62  | 8.53E-02 | 9.99E-01 | Morn1         |
| ENSMUSG00000036306 | 0.62  | 1.66E-01 | 9.99E-01 | Lzts1         |
| ENSMUSG00000015090 | 0.62  | 6.85E-02 | 9.99E-01 | Ptgds         |
| ENSMUSG00000040260 | 0.63  | 2.14E-01 | 9.99E-01 | Daam2         |
| ENSMUSG00000030790 | 0.63  | 1.41E-01 | 9.99E-01 | Adm           |
| ENSMUSG00000000794 | 0.63  | 3.09E-01 | 9.99E-01 | Kcnn3         |
| ENSMUSG00000026227 | 0.63  | 1.47E-01 | 9.99E-01 | 2810459M11Rik |

|                    |      |          |          |         |
|--------------------|------|----------|----------|---------|
| ENSMUSG00000002908 | 0.63 | 1.77E-01 | 9.99E-01 | Kcnn1   |
| ENSMUSG00000056204 | 0.63 | 1.18E-01 | 9.99E-01 | Pgpep1  |
| ENSMUSG00000022565 | 0.63 | 1.24E-01 | 9.99E-01 | Plec    |
| ENSMUSG00000032269 | 0.63 | 3.09E-01 | 9.99E-01 | Htr3a   |
| ENSMUSG00000034472 | 0.63 | 3.61E-01 | 9.99E-01 | Rasd2   |
| ENSMUSG00000032298 | 0.64 | 3.12E-02 | 9.99E-01 | Neil1   |
| ENSMUSG00000027333 | 0.64 | 1.02E-01 | 9.99E-01 | Smox    |
| ENSMUSG00000024206 | 0.64 | 1.07E-02 | 9.99E-01 | Rfx2    |
| ENSMUSG00000037705 | 0.64 | 2.24E-01 | 9.99E-01 | Tecta   |
| ENSMUSG00000056938 | 0.65 | 5.67E-02 | 9.99E-01 | Acbd4   |
| ENSMUSG00000051703 | 0.65 | 1.09E-01 | 9.99E-01 | Tmem198 |
| ENSMUSG00000030337 | 0.65 | 1.12E-01 | 9.99E-01 | Vamp1   |
| ENSMUSG00000033083 | 0.65 | 1.16E-01 | 9.99E-01 | Tbc1d4  |
| ENSMUSG00000042647 | 0.66 | 1.58E-01 | 9.99E-01 | Acad12  |
| ENSMUSG00000021379 | 0.66 | 1.47E-01 | 9.99E-01 | Id4     |
| ENSMUSG00000033059 | 0.66 | 1.31E-01 | 9.99E-01 | Pygb    |
| ENSMUSG00000023800 | 0.66 | 1.63E-01 | 9.99E-01 | Tiam2   |
| ENSMUSG00000027684 | 0.66 | 2.05E-01 | 9.99E-01 | Mecom   |
| ENSMUSG00000004415 | 0.67 | 1.68E-01 | 9.99E-01 | Col26a1 |
| ENSMUSG00000023990 | 0.67 | 4.72E-02 | 9.99E-01 | Tfeb    |
| ENSMUSG00000002409 | 0.67 | 1.85E-01 | 9.99E-01 | Dyrk1b  |
| ENSMUSG00000040841 | 0.67 | 2.59E-02 | 9.99E-01 | Six5    |
| ENSMUSG00000020297 | 0.67 | 1.64E-01 | 9.99E-01 | Nsg2    |
| ENSMUSG00000006205 | 0.67 | 1.06E-01 | 9.99E-01 | Htra1   |
| ENSMUSG00000055799 | 0.67 | 6.79E-02 | 9.99E-01 | Tcf7l1  |
| ENSMUSG00000058586 | 0.67 | 7.10E-02 | 9.99E-01 | Serhl   |
| ENSMUSG00000041351 | 0.67 | 5.43E-02 | 9.99E-01 | Rap1gap |
| ENSMUSG00000032656 | 0.68 | 1.96E-01 | 9.99E-01 | March3  |
| ENSMUSG00000069633 | 0.68 | 1.63E-01 | 9.99E-01 | Pex11g  |
| ENSMUSG00000042804 | 0.68 | 1.86E-01 | 9.99E-01 | Gpr153  |
| ENSMUSG00000032087 | 0.68 | 2.90E-01 | 9.99E-01 | Dscaml1 |
| ENSMUSG00000032741 | 0.69 | 9.26E-02 | 9.99E-01 | Tpcn1   |
| ENSMUSG00000003436 | 0.69 | 1.03E-01 | 9.99E-01 | Dll3    |
| ENSMUSG00000050953 | 0.69 | 8.04E-03 | 9.99E-01 | Gja1    |
| ENSMUSG00000020785 | 0.70 | 1.42E-01 | 9.99E-01 | Camkk1  |
| ENSMUSG00000005686 | 0.70 | 6.05E-02 | 9.99E-01 | Ampd3   |
| ENSMUSG00000044337 | 0.71 | 3.65E-01 | 9.99E-01 | Ackr3   |
| ENSMUSG00000021127 | 0.71 | 6.95E-02 | 9.99E-01 | Zfp361l |
| ENSMUSG00000034227 | 0.71 | 3.92E-02 | 9.99E-01 | Foxj1   |
| ENSMUSG00000074170 | 0.71 | 8.35E-02 | 9.99E-01 | Plekhf1 |
| ENSMUSG00000030621 | 0.71 | 1.91E-01 | 9.99E-01 | Me3     |
| ENSMUSG00000031765 | 0.72 | 5.48E-02 | 9.99E-01 | Mt1     |
| ENSMUSG00000058056 | 0.72 | 4.01E-02 | 9.99E-01 | Palld   |
| ENSMUSG00000001911 | 0.73 | 2.66E-02 | 9.99E-01 | Nfix    |
| ENSMUSG00000043557 | 0.73 | 8.60E-02 | 9.99E-01 | Mdgal   |
| ENSMUSG00000046618 | 0.74 | 1.58E-01 | 9.99E-01 | Olfml2a |
| ENSMUSG00000010660 | 0.74 | 1.71E-01 | 9.99E-01 | Plcd1   |

|                    |      |          |          |               |
|--------------------|------|----------|----------|---------------|
| ENSMUSG00000063160 | 0.74 | 8.40E-02 | 9.99E-01 | Numbl         |
| ENSMUSG00000049556 | 0.74 | 9.13E-02 | 9.99E-01 | Lingo1        |
| ENSMUSG00000055782 | 0.74 | 1.21E-01 | 9.99E-01 | Abcd2         |
| ENSMUSG00000001750 | 0.75 | 4.08E-02 | 9.99E-01 | Tcirg1        |
| ENSMUSG00000001552 | 0.75 | 5.94E-02 | 9.99E-01 | Jup           |
| ENSMUSG00000049608 | 0.75 | 8.31E-02 | 9.99E-01 | Gpr55         |
| ENSMUSG00000035357 | 0.75 | 6.39E-02 | 9.99E-01 | Pdzrn3        |
| ENSMUSG00000022790 | 0.75 | 1.50E-01 | 9.99E-01 | Igsf11        |
| ENSMUSG00000049265 | 0.76 | 2.90E-01 | 9.99E-01 | Kcnk3         |
| ENSMUSG00000092274 | 0.76 | 1.14E-01 | 9.99E-01 | Neat1         |
| ENSMUSG00000032368 | 0.76 | 1.86E-02 | 9.99E-01 | Zic1          |
| ENSMUSG00000027298 | 0.76 | 4.17E-02 | 9.99E-01 | Tyro3         |
| ENSMUSG00000016028 | 0.77 | 9.62E-02 | 9.99E-01 | Celsr1        |
| ENSMUSG00000022382 | 0.77 | 3.07E-01 | 9.99E-01 | Wnt7b         |
| ENSMUSG00000000325 | 0.79 | 8.53E-02 | 9.99E-01 | Arvcf         |
| ENSMUSG00000032744 | 0.79 | 2.51E-01 | 9.99E-01 | Heyl          |
| ENSMUSG00000006958 | 0.80 | 2.65E-02 | 9.99E-01 | Chrd          |
| ENSMUSG00000031983 | 0.81 | 9.49E-02 | 9.99E-01 | 2310022B05Rik |
| ENSMUSG00000071604 | 0.81 | 1.43E-01 | 9.99E-01 | Fam189a2      |
| ENSMUSG00000036528 | 0.81 | 3.22E-01 | 9.99E-01 | Ppfibp2       |
| ENSMUSG00000023913 | 0.81 | 3.57E-01 | 9.99E-01 | Pla2g7        |
| ENSMUSG00000004105 | 0.82 | 1.24E-01 | 9.99E-01 | Angptl2       |
| ENSMUSG00000020108 | 0.83 | 2.67E-01 | 9.99E-01 | Ddit4         |
| ENSMUSG00000030087 | 0.84 | 3.11E-01 | 9.99E-01 | Klf15         |
| ENSMUSG00000028927 | 0.84 | 2.53E-01 | 9.99E-01 | Padi2         |
| ENSMUSG00000030428 | 0.84 | 3.02E-01 | 9.99E-01 | Ttyh1         |
| ENSMUSG00000052135 | 0.84 | 1.52E-02 | 9.99E-01 | Foxo6         |
| ENSMUSG00000068299 | 0.85 | 1.24E-01 | 9.99E-01 | Nat8f4        |
| ENSMUSG00000060376 | 0.85 | 5.58E-02 | 9.99E-01 | Bckdha        |
| ENSMUSG00000041544 | 0.85 | 2.57E-02 | 9.99E-01 | Disp3         |
| ENSMUSG00000023885 | 0.86 | 2.24E-01 | 9.99E-01 | Thbs2         |
| ENSMUSG00000040659 | 0.86 | 2.93E-02 | 9.99E-01 | Efhd2         |
| ENSMUSG00000034614 | 0.86 | 1.28E-01 | 9.99E-01 | Pik3ip1       |
| ENSMUSG00000019960 | 0.87 | 2.74E-01 | 9.99E-01 | Dusp6         |
| ENSMUSG00000029413 | 0.88 | 1.97E-01 | 9.99E-01 | Naaa          |
| ENSMUSG00000024076 | 0.88 | 6.08E-02 | 9.99E-01 | Vit           |
| ENSMUSG00000028558 | 0.88 | 2.97E-01 | 9.99E-01 | Calr4         |
| ENSMUSG00000047786 | 0.89 | 9.87E-05 | 9.75E-02 | Lix1          |
| ENSMUSG00000020591 | 0.89 | 1.01E-01 | 9.99E-01 | Ntsr2         |
| ENSMUSG00000057060 | 0.89 | 1.77E-01 | 9.99E-01 | Slc35f3       |
| ENSMUSG00000040093 | 0.90 | 3.65E-01 | 9.99E-01 | Bmf           |
| ENSMUSG00000027447 | 0.92 | 6.95E-02 | 9.99E-01 | Cst3          |
| ENSMUSG00000002346 | 0.93 | 9.56E-02 | 9.99E-01 | Slc25a42      |
| ENSMUSG00000032394 | 0.93 | 9.59E-02 | 9.99E-01 | Igdcc3        |
| ENSMUSG00000053113 | 0.93 | 2.11E-01 | 9.99E-01 | Socs3         |
| ENSMUSG00000047361 | 0.93 | 1.33E-01 | 9.99E-01 | Gm973         |
| ENSMUSG00000032268 | 0.94 | 1.10E-01 | 9.99E-01 | Tmprss5       |

|                    |      |          |          |          |
|--------------------|------|----------|----------|----------|
| ENSMUSG00000030605 | 0.95 | 1.93E-01 | 9.99E-01 | Mfge8    |
| ENSMUSG00000036995 | 0.96 | 8.24E-02 | 9.99E-01 | Asap3    |
| ENSMUSG00000070509 | 0.96 | 2.22E-01 | 9.99E-01 | Rgma     |
| ENSMUSG00000069805 | 0.96 | 5.21E-02 | 9.99E-01 | Fbp1     |
| ENSMUSG00000022358 | 0.97 | 2.99E-01 | 9.99E-01 | Fbxo32   |
| ENSMUSG00000036611 | 0.99 | 7.63E-02 | 9.99E-01 | Eepd1    |
| ENSMUSG00000022438 | 1.00 | 4.86E-02 | 9.99E-01 | Parvb    |
| ENSMUSG00000025911 | 1.00 | 6.89E-02 | 9.99E-01 | Adhfe1   |
| ENSMUSG00000028919 | 1.01 | 5.78E-02 | 9.99E-01 | Arhgef19 |
| ENSMUSG00000034714 | 1.02 | 2.17E-01 | 9.99E-01 | Ttyh2    |
| ENSMUSG00000063171 | 1.03 | 4.01E-03 | 9.68E-01 | Rps4l    |
| ENSMUSG00000039533 | 1.03 | 3.00E-01 | 9.99E-01 | Mmd2     |
| ENSMUSG00000024552 | 1.04 | 3.16E-02 | 9.99E-01 | Slc14a2  |
| ENSMUSG00000019359 | 1.05 | 6.38E-02 | 9.99E-01 | Gdpd2    |
| ENSMUSG00000018169 | 1.06 | 1.76E-02 | 9.99E-01 | Mfng     |
| ENSMUSG00000032556 | 1.08 | 1.58E-01 | 9.99E-01 | Bfsp2    |
| ENSMUSG00000035606 | 1.08 | 3.30E-02 | 9.99E-01 | Ky       |
| ENSMUSG00000047793 | 1.09 | 9.86E-02 | 9.99E-01 | Sned1    |
| ENSMUSG00000019577 | 1.10 | 1.84E-01 | 9.99E-01 | Pdk4     |
| ENSMUSG00000071550 | 1.11 | 1.77E-01 | 9.99E-01 | Cfap44   |
| ENSMUSG00000026475 | 1.12 | 5.18E-03 | 9.99E-01 | Rgs16    |
| ENSMUSG00000057880 | 1.12 | 2.40E-01 | 9.99E-01 | Abat     |
| ENSMUSG00000059742 | 1.13 | 1.11E-01 | 9.99E-01 | Kcnh7    |
| ENSMUSG00000041771 | 1.15 | 8.22E-02 | 9.99E-01 | Slc24a4  |
| ENSMUSG00000028167 | 1.16 | 1.06E-01 | 9.99E-01 | Bdh2     |
| ENSMUSG00000030088 | 1.17 | 9.51E-03 | 9.99E-01 | Aldh11l  |
| ENSMUSG00000014846 | 1.19 | 2.84E-02 | 9.99E-01 | Tppp3    |
| ENSMUSG00000040373 | 1.19 | 1.06E-02 | 9.99E-01 | Cacng5   |
| ENSMUSG00000024227 | 1.21 | 1.35E-01 | 9.99E-01 | Pdzph1   |
| ENSMUSG00000040495 | 1.21 | 9.03E-02 | 9.99E-01 | Chrm4    |
| ENSMUSG00000046182 | 1.22 | 1.86E-01 | 9.99E-01 | Gsg1l    |
| ENSMUSG00000025780 | 1.26 | 2.11E-01 | 9.99E-01 | Itih5    |
| ENSMUSG00000034706 | 1.29 | 9.17E-02 | 9.99E-01 | Dnaic2   |
| ENSMUSG00000039410 | 1.31 | 4.33E-02 | 9.99E-01 | Prdm16   |
| ENSMUSG00000041556 | 1.32 | 2.92E-02 | 9.99E-01 | Fbxo2    |
| ENSMUSG00000047935 | 1.32 | 7.87E-03 | 9.99E-01 | Gm5607   |
| ENSMUSG00000071847 | 1.33 | 1.54E-01 | 9.99E-01 | Apcdd1   |
| ENSMUSG00000017692 | 1.33 | 1.03E-01 | 9.99E-01 | Rhbdl3   |
| ENSMUSG00000051041 | 1.34 | 2.06E-01 | 9.99E-01 | Olfml1   |
| ENSMUSG00000022494 | 1.40 | 8.11E-02 | 9.99E-01 | Shisa9   |
| ENSMUSG00000049555 | 1.40 | 2.28E-02 | 9.99E-01 | Tmie     |
| ENSMUSG00000029005 | 1.42 | 1.05E-01 | 9.99E-01 | Draxin   |
| ENSMUSG00000027215 | 1.42 | 1.67E-01 | 9.99E-01 | Cd82     |
| ENSMUSG00000053846 | 1.47 | 4.45E-02 | 9.99E-01 | Lipg     |
| ENSMUSG00000090122 | 1.48 | 3.25E-03 | 9.28E-01 | Kcne1l   |
| ENSMUSG00000054477 | 1.48 | 2.30E-01 | 9.99E-01 | Kcnn2    |
| ENSMUSG00000021933 | 1.49 | 5.24E-02 | 9.99E-01 | Gucy1b2  |

|                    |      |          |          |          |
|--------------------|------|----------|----------|----------|
| ENSMUSG00000024197 | 1.54 | 7.38E-03 | 9.99E-01 | Plin3    |
| ENSMUSG00000026614 | 1.57 | 4.68E-02 | 9.99E-01 | Slc30a10 |
| ENSMUSG00000007279 | 1.61 | 6.41E-02 | 9.99E-01 | Scube2   |
| ENSMUSG00000042607 | 1.81 | 8.73E-03 | 9.99E-01 | Asb4     |
| ENSMUSG00000030208 | 2.04 | 9.43E-02 | 9.99E-01 | Emp1     |
| ENSMUSG00000021848 | 2.73 | 9.92E-02 | 9.99E-01 | Otx2     |



**Table S3:** Differentially expressed genes in *E12*<sup>-/-</sup> primary embryonic NSCs having an E2A binding site in WT cells. Depicted are the results from RNA-Seq indicating the fold-change in gene expression as log<sub>2</sub> (log<sub>2</sub>FC), variance between triplicates as P or Benjamin-Hochberg adjusted P value (adjP).

| ensembl             | log <sub>2</sub> FC | P         | adjP      | Symbol        |
|---------------------|---------------------|-----------|-----------|---------------|
| ENSMUSG00000001506  | -1.85               | 6.19E-13  | 1.91E-09  | Col1a1        |
| ENSMUSG000000039954 | -1.81               | 1.66E-02  | 3.60E-01  | Stk32a        |
| ENSMUSG000000034674 | -1.64               | 1.39E-120 | 8.59E-117 | Tdg           |
| ENSMUSG000000020000 | -1.45               | 5.06E-03  | 2.35E-01  | Moxd1         |
| ENSMUSG00000005883  | -1.43               | 6.96E-06  | 4.77E-03  | Spo11         |
| ENSMUSG000000023236 | -1.40               | 2.50E-02  | 4.15E-01  | Scg5          |
| ENSMUSG000000029231 | -1.35               | 7.45E-03  | 2.77E-01  | Pdgfra        |
| ENSMUSG000000052613 | -1.32               | 7.25E-03  | 2.75E-01  | Pcdh15        |
| ENSMUSG000000030302 | -1.31               | 2.77E-02  | 4.30E-01  | Atp2b2        |
| ENSMUSG000000043753 | -1.27               | 5.40E-03  | 2.40E-01  | Dmrta1        |
| ENSMUSG000000036815 | -1.20               | 1.43E-01  | 6.85E-01  | Dpp10         |
| ENSMUSG000000062760 | -1.15               | 1.46E-03  | 1.32E-01  | 1810041L15Rik |
| ENSMUSG000000027584 | -1.13               | 2.56E-03  | 1.73E-01  | Oprl1         |
| ENSMUSG000000049336 | -1.07               | 1.06E-03  | 1.08E-01  | Tenm2         |
| ENSMUSG000000069763 | -1.07               | 1.26E-02  | 3.34E-01  | Tmem100       |
| ENSMUSG000000044519 | -1.06               | 8.86E-06  | 5.21E-03  | Zfp488        |
| ENSMUSG000000024935 | -1.04               | 2.88E-02  | 4.34E-01  | Slc1a1        |
| ENSMUSG000000023011 | -1.04               | 4.30E-02  | 5.04E-01  | Faim2         |
| ENSMUSG000000005672 | -1.01               | 1.67E-02  | 3.60E-01  | Kit           |
| ENSMUSG000000063320 | -1.00               | 3.40E-04  | 5.86E-02  | 1190007I07Rik |
| ENSMUSG000000018537 | -0.99               | 5.53E-02  | 5.49E-01  | Pcgf2         |
| ENSMUSG000000028655 | -0.99               | 7.73E-02  | 5.93E-01  | Mfsd2a        |
| ENSMUSG000000063446 | -0.97               | 1.57E-04  | 3.65E-02  | Plppr1        |
| ENSMUSG000000022367 | -0.97               | 1.88E-04  | 3.99E-02  | Has2          |
| ENSMUSG000000030854 | -0.97               | 2.86E-03  | 1.80E-01  | Ptpn5         |
| ENSMUSG000000031285 | -0.92               | 6.14E-02  | 5.58E-01  | Dcx           |
| ENSMUSG000000032087 | -0.91               | 1.83E-03  | 1.43E-01  | Dscaml1       |
| ENSMUSG000000024347 | -0.87               | 1.28E-02  | 3.36E-01  | Psd2          |
| ENSMUSG000000025429 | -0.84               | 1.55E-03  | 1.35E-01  | Pstpip2       |
| ENSMUSG000000050908 | -0.84               | 9.49E-02  | 6.28E-01  | Tvp23a        |
| ENSMUSG000000043635 | -0.84               | 9.06E-12  | 2.24E-08  | Adamts3       |
| ENSMUSG000000005125 | -0.83               | 8.56E-02  | 6.10E-01  | Ndrgr1        |
| ENSMUSG000000028626 | -0.83               | 1.08E-02  | 3.17E-01  | Col9a2        |
| ENSMUSG000000026547 | -0.78               | 4.11E-02  | 4.96E-01  | Tagln2        |
| ENSMUSG000000035105 | -0.77               | 1.64E-01  | 7.09E-01  | Egln3         |
| ENSMUSG000000041073 | -0.76               | 1.53E-02  | 3.51E-01  | Nacad         |
| ENSMUSG000000010505 | -0.76               | 6.15E-02  | 5.58E-01  | Myt1          |

|                    |       |          |          |          |
|--------------------|-------|----------|----------|----------|
| ENSMUSG00000067028 | -0.74 | 9.49E-03 | 3.11E-01 | Cntnap5b |
| ENSMUSG00000028358 | -0.74 | 6.49E-04 | 8.47E-02 | Zfp618   |
| ENSMUSG00000074607 | -0.74 | 1.30E-03 | 1.23E-01 | Tox2     |
| ENSMUSG00000018865 | -0.74 | 5.21E-02 | 5.37E-01 | Sult4a1  |
| ENSMUSG00000048978 | -0.74 | 1.43E-02 | 3.46E-01 | Nrsn1    |
| ENSMUSG00000022044 | -0.74 | 1.43E-01 | 6.85E-01 | Stmn4    |
| ENSMUSG00000062591 | -0.73 | 7.49E-03 | 2.78E-01 | Tubb4a   |
| ENSMUSG00000037625 | -0.73 | 1.22E-02 | 3.31E-01 | Cldn11   |
| ENSMUSG00000027419 | -0.72 | 9.94E-02 | 6.34E-01 | Pcsk2    |
| ENSMUSG00000040606 | -0.72 | 9.31E-03 | 3.08E-01 | Kazn     |
| ENSMUSG00000038457 | -0.72 | 1.92E-02 | 3.80E-01 | Tmem255b |
| ENSMUSG00000020034 | -0.72 | 3.57E-04 | 5.86E-02 | Tcp11l2  |
| ENSMUSG00000022346 | -0.72 | 2.63E-01 | 7.81E-01 | Myc      |
| ENSMUSG00000053825 | -0.71 | 1.45E-02 | 3.46E-01 | Ppfi2    |
| ENSMUSG00000030208 | -0.71 | 1.02E-02 | 3.16E-01 | Emp1     |
| ENSMUSG00000021451 | -0.70 | 6.32E-02 | 5.59E-01 | Sema4d   |
| ENSMUSG00000028137 | -0.70 | 2.57E-02 | 4.24E-01 | Celf3    |
| ENSMUSG00000035778 | -0.69 | 1.01E-01 | 6.34E-01 | Ggta1    |
| ENSMUSG00000026778 | -0.68 | 7.45E-06 | 4.84E-03 | Prkcq    |
| ENSMUSG00000024500 | -0.67 | 3.55E-04 | 5.86E-02 | Ppp2r2b  |
| ENSMUSG00000020173 | -0.67 | 3.18E-02 | 4.50E-01 | Cobl     |
| ENSMUSG00000028128 | -0.67 | 3.16E-06 | 2.44E-03 | F3       |
| ENSMUSG00000037754 | -0.67 | 2.68E-04 | 5.11E-02 | Ppp1r16b |
| ENSMUSG00000041261 | -0.67 | 1.02E-06 | 1.05E-03 | Car8     |
| ENSMUSG00000049612 | -0.67 | 6.93E-05 | 2.19E-02 | Omg      |
| ENSMUSG00000062110 | -0.66 | 3.78E-05 | 1.41E-02 | Scfd2    |
| ENSMUSG00000015829 | -0.66 | 3.32E-03 | 1.94E-01 | Tnr      |
| ENSMUSG00000032425 | -0.65 | 1.03E-02 | 3.16E-01 | Zfp949   |
| ENSMUSG00000037664 | -0.65 | 9.26E-05 | 2.60E-02 | Cdkn1c   |
| ENSMUSG00000038068 | -0.64 | 2.68E-02 | 4.26E-01 | Rnf144b  |
| ENSMUSG00000023341 | -0.64 | 1.39E-02 | 3.42E-01 | Mx2      |
| ENSMUSG00000021696 | -0.63 | 3.31E-02 | 4.52E-01 | Elovl7   |
| ENSMUSG00000026764 | -0.63 | 4.11E-03 | 2.12E-01 | Kif5c    |
| ENSMUSG00000026442 | -0.63 | 3.08E-02 | 4.47E-01 | Nfasc    |
| ENSMUSG00000031673 | -0.62 | 1.75E-03 | 1.42E-01 | Cdh11    |
| ENSMUSG00000042751 | -0.62 | 7.94E-05 | 2.39E-02 | Nmnat2   |
| ENSMUSG00000026614 | -0.62 | 3.63E-02 | 4.72E-01 | Slc30a10 |
| ENSMUSG00000056966 | -0.61 | 7.53E-02 | 5.92E-01 | Gjc3     |
| ENSMUSG00000041817 | -0.61 | 2.13E-02 | 3.97E-01 | Fam169a  |
| ENSMUSG00000058966 | -0.61 | 1.55E-02 | 3.54E-01 | Fam57b   |
| ENSMUSG00000021895 | -0.61 | 5.08E-05 | 1.69E-02 | Arhgef3  |
| ENSMUSG00000029053 | -0.60 | 2.78E-02 | 4.30E-01 | Prkcz    |
| ENSMUSG00000031028 | -0.60 | 9.40E-02 | 6.27E-01 | Tub      |
| ENSMUSG00000041607 | -0.60 | 9.96E-02 | 6.34E-01 | Mbp      |
| ENSMUSG00000036800 | -0.60 | 1.58E-01 | 7.01E-01 | Fam135b  |
| ENSMUSG00000060988 | -0.59 | 7.76E-02 | 5.93E-01 | Galnt13  |
| ENSMUSG00000030096 | -0.58 | 9.19E-04 | 1.03E-01 | Slc6a6   |

|                    |       |          |          |               |
|--------------------|-------|----------|----------|---------------|
| ENSMUSG00000032017 | -0.58 | 4.55E-02 | 5.11E-01 | Grik4         |
| ENSMUSG00000087579 | 0.58  | 4.52E-02 | 5.10E-01 | 1500017E21Rik |
| ENSMUSG00000083022 | 0.58  | 6.86E-02 | 5.75E-01 | Rps15a-ps6    |
| ENSMUSG00000039115 | 0.59  | 6.86E-03 | 2.66E-01 | Itga9         |
| ENSMUSG00000029408 | 0.59  | 6.08E-02 | 5.58E-01 | Abcb9         |
| ENSMUSG00000078234 | 0.59  | 1.17E-01 | 6.58E-01 | Klhdc7a       |
| ENSMUSG00000026131 | 0.60  | 1.12E-03 | 1.10E-01 | Dst           |
| ENSMUSG00000071042 | 0.61  | 4.45E-02 | 5.07E-01 | Rasgrp3       |
| ENSMUSG00000032193 | 0.61  | 1.99E-05 | 9.43E-03 | Ldlr          |
| ENSMUSG00000070047 | 0.61  | 4.32E-02 | 5.04E-01 | Fat1          |
| ENSMUSG00000046186 | 0.61  | 2.58E-06 | 2.12E-03 | Cd109         |
| ENSMUSG00000031465 | 0.61  | 8.55E-04 | 1.00E-01 | Angpt2        |
| ENSMUSG00000029378 | 0.63  | 5.93E-02 | 5.58E-01 | Areg          |
| ENSMUSG00000025475 | 0.63  | 2.77E-02 | 4.30E-01 | Adgra1        |
| ENSMUSG00000037010 | 0.63  | 9.98E-02 | 6.34E-01 | Apln          |
| ENSMUSG00000003032 | 0.65  | 3.68E-03 | 2.04E-01 | Klf4          |
| ENSMUSG00000092035 | 0.65  | 1.01E-01 | 6.35E-01 | Peg10         |
| ENSMUSG00000064373 | 0.65  | 2.40E-01 | 7.68E-01 | Selenop       |
| ENSMUSG00000028780 | 0.65  | 7.80E-04 | 9.39E-02 | Sema3c        |
| ENSMUSG00000046743 | 0.66  | 2.45E-04 | 4.87E-02 | Fat4          |
| ENSMUSG00000021991 | 0.67  | 1.95E-05 | 9.43E-03 | Cacna2d3      |
| ENSMUSG00000035606 | 0.68  | 6.99E-02 | 5.79E-01 | Ky            |
| ENSMUSG00000066842 | 0.69  | 2.92E-04 | 5.29E-02 | Hmcn1         |
| ENSMUSG00000026628 | 0.69  | 2.14E-01 | 7.45E-01 | Atf3          |
| ENSMUSG00000032332 | 0.69  | 1.61E-03 | 1.37E-01 | Col12a1       |
| ENSMUSG00000054612 | 0.69  | 6.09E-03 | 2.54E-01 | Mgmt          |
| ENSMUSG00000040373 | 0.72  | 1.25E-02 | 3.34E-01 | Cacng5        |
| ENSMUSG00000068794 | 0.74  | 6.57E-04 | 8.47E-02 | Col28a1       |
| ENSMUSG00000063558 | 0.75  | 8.94E-03 | 3.07E-01 | Aox1          |
| ENSMUSG00000022594 | 0.76  | 6.04E-11 | 1.24E-07 | Lynx1         |
| ENSMUSG00000032440 | 0.77  | 9.77E-04 | 1.05E-01 | Tgfbr2        |
| ENSMUSG00000061808 | 0.78  | 5.47E-01 | 8.99E-01 | Ttr           |
| ENSMUSG00000003617 | 0.80  | 7.85E-02 | 5.93E-01 | Cp            |
| ENSMUSG00000052854 | 0.82  | 1.35E-02 | 3.38E-01 | Nrk           |
| ENSMUSG00000059003 | 0.84  | 3.20E-02 | 4.50E-01 | Grin2a        |
| ENSMUSG00000040605 | 0.87  | 1.05E-03 | 1.08E-01 | Bace2         |
| ENSMUSG00000040998 | 0.89  | 7.89E-06 | 4.87E-03 | Npnt          |
| ENSMUSG00000025582 | 0.93  | 2.84E-08 | 3.90E-05 | Nptx1         |
| ENSMUSG00000028214 | 0.95  | 2.44E-05 | 1.01E-02 | Gem           |
| ENSMUSG00000027861 | 0.95  | 6.64E-03 | 2.61E-01 | Casq2         |
| ENSMUSG00000022330 | 1.09  | 3.56E-02 | 4.67E-01 | Osr2          |
| ENSMUSG00000035686 | 1.12  | 1.00E-05 | 5.63E-03 | Thrsp         |
| ENSMUSG00000003545 | 1.14  | 4.97E-09 | 7.67E-06 | Fosb          |
